# Supplementary material
Source: PubMed Central journal article supplement (PMC5879623)
Supplement: rspb20172593supp1.pdf [file rspb20172593supp1.pdf]

## Electronic Supplementary Material

### Testing congeneric niche overlap with an alternative taxonomy

#### Figure SM1

#### Tables S1-S4

(Handbook of the Birds of the World, Version 2.0, December 2017,

<http://datazone.birdlife.org/species/taxonomy>)

Note: The below outlines the results of all analyses using the alternative taxonomy above, with all methodologies for the analyses otherwise following those described in the main text.

#### Biotic predictions: thermal niche overlap between congeners

Across seasons, congeneric thermal niches were more segregated in the highly speciose east than in the relatively species-poor west ( $\beta_{\text{region}} = 0.64$  [0.40, 0.90]; McFadden's Pseudo- $R^2 = 0.14$ ). With summer and winter congeneric niche overlap data pooled, thermal niche overlap was unrelated to body size similarity between congeneric species pairs in either the east or the west ( $\beta_{\text{east}} = 0.01$  [-1.48, 1.43];  $\beta_{\text{west}} = 0.86$  [-0.29, 2.01]; McFadden's Pseudo- $R^2 = 0.00$ ).

#### Abiotic-biotic interactions: seasonality and thermal niche overlap between congeners

Congeners in the relatively species-poor west segregated in thermal space more in winter than in summer ( $\beta = -0.72$  [-1.22, -0.28]; McFadden's Pseudo- $R^2$  global model = 0.24), but the degree of congeneric segregation was unrelated to body size similarity between congeners ( $\beta_{\text{summer}} = 1.27$  [-0.10, 2.62];  $\beta_{\text{winter}} = -0.57$  [-3.17, 2.07]; Fig. SM1a). In the highly speciose (but less seasonal) east, we found opposite patterns between congeneric overlap and body size similarity across seasons. While qualitatively similar in direction to the results from our main analyses (see paper), these relationships—with the alternative taxonomy—were somewhat weaker. Similarly-sized congeners were more likely to

segregate in thermal space in the winter in the east ( $\beta_{\text{winter}} = 1.62 [-0.22, 3.43]$ , 90% CI = [0.07, 3.14]; Fig. SM1b), while the relationship reversed in summer, with similarly-sized species in the east more likely to share thermal niche space ( $\beta_{\text{summer}} = -1.40 [-3.80, 0.75]$ , 80% CI = [-2.94, 0.00]; Fig. SM1b).

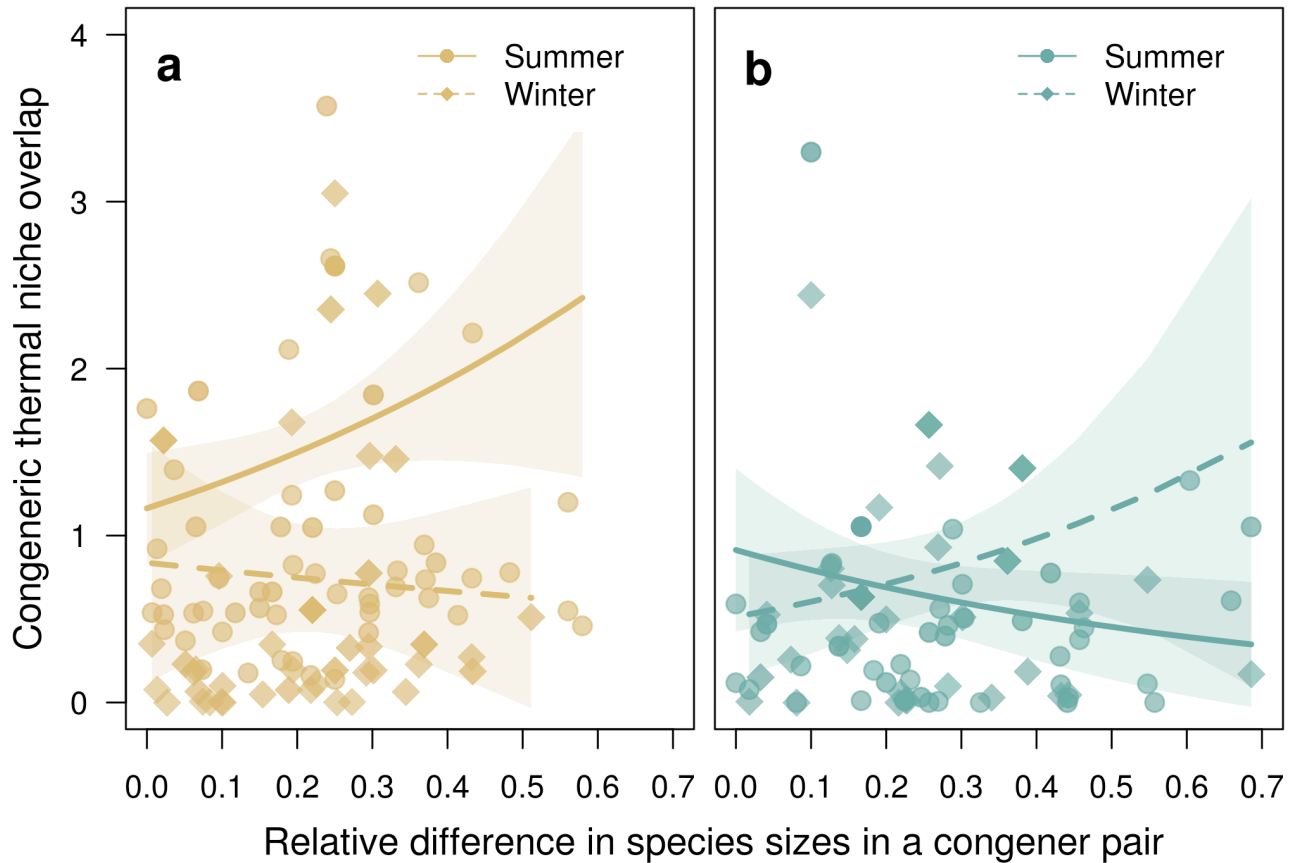

**Figure SM1.** Relationship between thermal niche overlap and relative size differences between congeneric species pairs of Himalayan birds ( $N = 177$  pairs; 38 genera). (a) In the west, thermal niche overlap between congeners was not related to differences in body size in either summer or in winter. (b) In the east, similarly sized congeners were more likely to segregate in thermal space in winter, but occupy similar thermal space in summer. Bold lines and shaded regions reflect predicted relationships from weighted quasipoisson regressions with 95% confidence intervals, respectively. The transparency of each point indicates its relative weight in the regression – bolder points contribute more towards model fit (see Methods in main text).

**Table S1. Species-specific thermal niche overlap between summer and winter, as calculated using the equation in Fig. 2a, with species traits used to predict thermal niche overlap (see Fig. 3).  $N_S$  and  $N_W$  represent summer and winter sample sizes, respectively.**

| ID | Common Name                     | Scientific Name                       | Region | Thermal Niche Overlap | $N_S$ | $N_W$ | Body Mass (g) | Diet | Median Temp (°C) |
|----|---------------------------------|---------------------------------------|--------|-----------------------|-------|-------|---------------|------|------------------|
| 1  | Ashy Drongo                     | <i>Dicrurus leucophaeus</i>           | East   | 0.193                 | 61    | 35    | 37.60         | I    | 16.11            |
| 2  | Ashy Wood Pigeon                | <i>Columba pulchricollis</i>          | East   | 0.090                 | 15    | 5     | 330.00        | F    | 12.85            |
| 3  | Ashy-throated Warbler           | <i>Phylloscopus maculipennis</i>      | East   | 0.632                 | 9     | 34    | 5.10          | I    | 14.22            |
| 4  | Bar-tailed Treecreeper          | <i>Certhia himalayana</i>             | West   | 0.084                 | 123   | 70    | 8.80          | I    | 13.53            |
| 5  | Bar-throated Minla              | <i>Minla strigula</i>                 | East   | 0.411                 | 44    | 14    | 19.20         | O    | 12.09            |
| 6  | Bay Woodpecker                  | <i>Blythipicus pyrrhotis</i>          | East   | 0.542                 | 31    | 47    | 132.00        | I    | 15.51            |
| 7  | Beautiful Siberia               | <i>Heterophasia pulchella</i>         | East   | 0.440                 | 215   | 214   | 41.00         | O    | 14.12            |
| 8  | Bhutan Laughingthrush           | <i>Trochalopteron imbricatum</i>      | East   | 0.000                 | 9     | 8     | 40.70         | O    | 15.34            |
| 9  | Black-and-yellow Grosbeak       | <i>Mycerobas icteroides</i>           | West   | 0.287                 | 84    | 75    | 67.00         | G    | 12.53            |
| 10 | Black-chinned Yuhina            | <i>Yuhina nigrimenta</i>              | East   | 0.021                 | 8     | 29    | 9.50          | O    | 15.85            |
| 11 | Black-faced Laughingthrush      | <i>Trochalopteron affine</i>          | East   | 0.000                 | 12    | 10    | 73.00         | O    | 12.60            |
| 12 | Black-faced Warbler             | <i>Abroscopus schisticeps</i>         | East   | 0.027                 | 18    | 21    | 4.70          | I    | 13.98            |
| 13 | Black-lored Tit                 | <i>Maclolophus xanthogenys</i>        | East   | 0.000                 | 5     | 9     | 14.90         | I    | 17.98            |
| 14 | Black-throated Bushtit          | <i>Aegithalos concinnus</i>           | East   | 0.000                 | 8     | 6     | 6.10          | I    | 16.39            |
| 15 | Black-throated Bushtit          | <i>Aegithalos concinnus</i>           | West   | 0.000                 | 14    | 14    | 6.10          | I    | 13.43            |
| 16 | Blue Whistling Thrush           | <i>Myophonus caeruleus</i>            | West   | 0.653                 | 217   | 75    | 158.00        | I    | 12.79            |
| 17 | Blue-fronted Redstart           | <i>Phoenicurus frontalis</i>          | West   | 0.138                 | 23    | 32    | 21.50         | I    | 11.74            |
| 18 | Blue-winged Minla               | <i>Minla cyanoptera</i>               | East   | 0.000                 | 19    | 5     | 17.00         | O    | 14.53            |
| 19 | Blyth's Leaf Warbler            | <i>Phylloscopus reguloides</i>        | East   | 1.153                 | 134   | 62    | 7.80          | I    | 14.26            |
| 20 | Brown Dipper                    | <i>Cinclus pallasii</i>               | West   | 0.633                 | 33    | 14    | 76.00         | I    | 13.29            |
| 21 | Brown-throated Fulvetta         | <i>Fulvetta ludlowi</i>               | East   | 0.000                 | 12    | 9     | 10.50         | I    | 11.68            |
| 22 | Buff-barred Warbler             | <i>Phylloscopus pulcher</i>           | West   | 0.001                 | 247   | 30    | 6.80          | I    | 11.74            |
| 23 | Chestnut-crowned Laughingthrush | <i>Trochalopteron erythrocephalum</i> | East   | 0.400                 | 107   | 105   | 71.70         | O    | 12.49            |
| 24 | Chestnut-crowned Laughingthrush | <i>Trochalopteron erythrocephalum</i> | West   | 0.124                 | 57    | 11    | 71.70         | O    | 12.69            |
| 25 | Chestnut-crowned Warbler        | <i>Seicercus castaniceps</i>          | East   | 0.128                 | 8     | 9     | 5.30          | I    | 14.90            |
| 27 | Chestnut-headed Tesia           | <i>Cettia castaneocoronata</i>        | East   | 1.182                 | 68    | 94    | 9.00          | I    | 12.41            |
| 26 | Chestnut-headed Tesia           | <i>Cettia castaneocoronata</i>        | West   | 0.069                 | 75    | 29    | 9.00          | I    | 13.61            |
| 28 | Coal Tit                        | <i>Periparus ater</i>                 | West   | 0.530                 | 410   | 217   | 9.20          | I    | 13.08            |
| 29 | Collared Grosbeak               | <i>Mycerobas affinis</i>              | West   | 0.283                 | 29    | 23    | 83.00         | G    | 11.02            |
| 30 | Common Rosefinch                | <i>Carpodacus erythrinus</i>          | West   | 0.000                 | 7     | 11    | 24.00         | G    | 11.73            |
| 31 | Fire-breasted Flowerpecker      | <i>Dicaeum ignipectum</i>             | East   | 0.282                 | 15    | 71    | 5.90          | O    | 15.45            |
| 32 | Goldcrest                       | <i>Regulus regulus</i>                | West   | 0.013                 | 21    | 15    | 5.55          | I    | 12.33            |
| 33 | Golden Babbler                  | <i>Stachyridopsis chrysaeca</i>       | East   | 0.000                 | 41    | 29    | 9.00          | I    | 17.15            |
| 34 | Golden Bush Robin               | <i>Tarsiger chrysaeus</i>             | West   | 0.013                 | 36    | 14    | 13.80         | I    | 11.45            |
| 35 | Golden-breasted Fulvetta        | <i>Lioparus chrysolis</i>             | East   | 0.000                 | 5     | 8     | 5.50          | I    | 13.71            |
| 36 | Golden-throated Barbet          | <i>Psilopogon franklinii</i>          | East   | 0.139                 | 75    | 23    | 63.50         | F    | 15.93            |
| 38 | Great Barbet                    | <i>Psilopogon virens</i>              | East   | 0.585                 | 135   | 115   | 202.00        | F    | 14.72            |
| 37 | Great Barbet                    | <i>Psilopogon virens</i>              | West   | 0.138                 | 54    | 24    | 202.00        | F    | 14.02            |
| 39 | Greater Yellownappe             | <i>Chrysophlegma flavinucha</i>       | East   | 0.000                 | 7     | 9     | 181.50        | I    | 17.16            |
| 40 | Green-backed Tit                | <i>Parus monticolus</i>               | East   | 0.630                 | 18    | 17    | 18.65         | I    | 11.59            |
| 41 | Green-backed Tit                | <i>Parus monticolus</i>               | West   | 0.070                 | 94    | 47    | 18.65         | I    | 13.27            |
| 42 | Green-tailed Sunbird            | <i>Aethopyga nipalensis</i>           | East   | 1.464                 | 184   | 190   | 6.90          | O    | 12.42            |
| 43 | Grey Crested Tit                | <i>Lophopanes dichrous</i>            | West   | 0.065                 | 39    | 29    | 12.70         | I    | 11.06            |
| 44 | Grey Peacock-pheasant           | <i>Polyplectron bicalcaratum</i>      | East   | 0.000                 | 24    | 6     | 605.00        | O    | 16.34            |
| 45 | Grey-bellied Tesia              | <i>Tesia cyaniventer</i>              | East   | 0.125                 | 127   | 21    | 9.70          | I    | 12.93            |
| 46 | Grey-cheeked Warbler            | <i>Seicercus poliogenys</i>           | East   | 0.595                 | 44    | 10    | 6.30          | I    | 14.60            |
| 47 | Grey-headed Canary-flycatcher   | <i>Culicicapa ceylonensis</i>         | East   | 0.093                 | 118   | 6     | 7.70          | I    | 15.45            |
| 48 | Grey-hooded Warbler             | <i>Phylloscopus xanthoschistos</i>    | West   | 0.288                 | 26    | 7     | 7.25          | I    | 12.73            |
| 49 | Grey-sided Bush Warbler         | <i>Cettia brunnifrons</i>             | West   | 0.231                 | 100   | 13    | 7.50          | I    | 11.57            |

**Table S1. continued**

| ID  | Common Name                     | Scientific Name                   | Region | Thermal Niche Overlap | N <sub>s</sub> | N <sub>w</sub> | Body Mass (g) | Diet | Median Temp (°C) |
|-----|---------------------------------|-----------------------------------|--------|-----------------------|----------------|----------------|---------------|------|------------------|
| 50  | Grey-sided Laughingthrush       | <i>Garrulax caerulatus</i>        | East   | 0.198                 | 50             | 17             | 89.00         | O    | 13.03            |
| 51  | Grey-winged Blackbird           | <i>Turdus boulboul</i>            | East   | 0.000                 | 5              | 5              | 97.10         | O    | 14.42            |
| 52  | Hill Partridge                  | <i>Arborophila torqueola</i>      | East   | 0.892                 | 125            | 53             | 345.50        | O    | 14.12            |
| 53  | Himalayan Bluetail              | <i>Tarsiger rufilatus</i>         | West   | 0.443                 | 175            | 44             | 12.90         | I    | 11.45            |
| 54  | Himalayan Cutia                 | <i>Cutia nipalensis</i>           | East   | 0.049                 | 40             | 17             | 46.00         | I    | 15.22            |
| 55  | Himalayan Monal                 | <i>Lophophorus impejanus</i>      | West   | 0.222                 | 178            | 92             | 2090.00       | O    | 11.54            |
| 56  | Himalayan Woodpecker            | <i>Dendrocopos himalayensis</i>   | West   | 0.522                 | 120            | 108            | 66.50         | I    | 13.22            |
| 57  | Hoary-throated Barwing          | <i>Actinodura nipalensis</i>      | East   | 0.044                 | 20             | 26             | 43.50         | O    | 14.59            |
| 58  | Hodgson's Treecreeper           | <i>Certhia hodgsoni</i>           | West   | 0.456                 | 84             | 45             | 9.00          | I    | 11.18            |
| 59  | Koklass Pheasant                | <i>Pucrasia macrolopha</i>        | West   | 0.077                 | 71             | 58             | 1058.00       | O    | 11.97            |
| 60  | Large Niltava                   | <i>Niltava grandis</i>            | East   | 0.330                 | 24             | 28             | 30.30         | I    | 15.51            |
| 61  | Large-billed Crow               | <i>Corvus macrorhynchos</i>       | West   | 0.188                 | 122            | 111            | 487.00        | O    | 13.01            |
| 62  | Lemon-rumped Warbler            | <i>Phylloscopus chloronotus</i>   | West   | 1.531                 | 431            | 52             | 5.10          | I    | 12.50            |
| 63  | Lesser Racket-tailed Drongo     | <i>Dicrurus remifer</i>           | East   | 0.370                 | 51             | 72             | 43.10         | I    | 17.01            |
| 64  | Long-tailed Minivet             | <i>Pericrocotus ethologus</i>     | West   | 0.271                 | 100            | 17             | 19.00         | O    | 13.00            |
| 65  | Long-tailed Sibia               | <i>Heterophasia picaoides</i>     | East   | 0.323                 | 30             | 31             | 42.40         | O    | 16.59            |
| 66  | Long-tailed Thrush              | <i>Zoothera dixonii</i>           | West   | 0.000                 | 23             | 5              | 90.00         | O    | 10.42            |
| 67  | Maroon Oriole                   | <i>Oriolus traillii</i>           | East   | 0.153                 | 48             | 13             | 71.00         | O    | 15.67            |
| 68  | Mountain Bulbul                 | <i>Ixos maclellandii</i>          | East   | 0.015                 | 9              | 67             | 32.50         | O    | 17.29            |
| 69  | Orange-bellied Leafbird         | <i>Chloropsis hardwickii</i>      | East   | 0.000                 | 13             | 19             | 32.50         | O    | 19.15            |
| 70  | Oriental Turtle Dove            | <i>Streptopelia orientalis</i>    | West   | 0.000                 | 32             | 5              | 233.00        | G    | 12.84            |
| 71  | Pale Blue Flycatcher            | <i>Cyornis unicolor</i>           | East   | 0.000                 | 55             | 8              | 21.00         | I    | 17.01            |
| 72  | Pink-browed Rosefinch           | <i>Carpodacus rodochroa</i>       | West   | 0.083                 | 95             | 25             | 18.00         | G    | 10.86            |
| 73  | Plain Mountain Finch            | <i>Leucosticte nemoricola</i>     | West   | 0.086                 | 9              | 70             | 22.70         | G    | 7.95             |
| 74  | Plumbeous Water Redstart        | <i>Phoenicurus fuliginosus</i>    | West   | 0.548                 | 91             | 26             | 20.40         | I    | 12.46            |
| 75  | Red-billed Chough               | <i>Pyrrhocorax pyrrhocorax</i>    | West   | 0.004                 | 8              | 16             | 268.00        | O    | 8.11             |
| 76  | Red-billed Leiothrix            | <i>Leiothrix lutea</i>            | East   | 0.353                 | 61             | 60             | 21.40         | O    | 11.59            |
| 77  | Red-tailed Minla                | <i>Minla ignotincta</i>           | East   | 0.226                 | 29             | 11             | 14.30         | O    | 11.78            |
| 78  | Rufous-backed Sibia             | <i>Heterophasia annectans</i>     | East   | 0.000                 | 9              | 7              | 24.20         | O    | 15.99            |
| 79  | Rufous-bellied Niltava          | <i>Niltava sundara</i>            | West   | 0.115                 | 39             | 9              | 21.10         | I    | 13.86            |
| 80  | Rufous-capped Babbler           | <i>Stachyridopsis ruficeps</i>    | East   | 0.728                 | 47             | 38             | 10.30         | I    | 14.44            |
| 81  | Rufous-gorgeted Flycatcher      | <i>Ficedula strophiatea</i>       | West   | 0.341                 | 186            | 29             | 13.00         | I    | 11.88            |
| 82  | Rufous-naped Tit                | <i>Periparus rufonuchalis</i>     | West   | 0.019                 | 22             | 61             | 13.05         | I    | 10.94            |
| 83  | Rufous-necked Hornbill          | <i>Aceros nipalensis</i>          | East   | 0.088                 | 19             | 12             | 2385.00       | F    | 16.54            |
| 84  | Rufous-vented Tit               | <i>Periparus rubidiventris</i>    | West   | 0.233                 | 84             | 28             | 11.80         | I    | 11.81            |
| 85  | Rufous-vented Yuhina            | <i>Yuhina occipitalis</i>         | East   | 0.407                 | 25             | 76             | 13.00         | O    | 11.53            |
| 86  | Rufous-winged Fulvetta          | <i>Alcippe castaneiceps</i>       | East   | 0.240                 | 29             | 9              | 12.50         | I    | 12.79            |
| 87  | Rusty-fronted Barwing           | <i>Actinodura egertoni</i>        | East   | 0.223                 | 63             | 19             | 36.00         | O    | 15.01            |
| 88  | Scaly-bellied Woodpecker        | <i>Picus squamatus</i>            | West   | 0.000                 | 16             | 9              | 170.00        | I    | 13.91            |
| 89  | Scaly-breasted Wren Babbler     | <i>Pnoepyga albiventer</i>        | West   | 0.313                 | 89             | 40             | 20.90         | I    | 11.27            |
| 90  | Sikkim Treecreeper              | <i>Certhia discolor</i>           | East   | 0.429                 | 18             | 9              | 10.40         | I    | 12.50            |
| 91  | Slaty-blue Flycatcher           | <i>Ficedula tricolor</i>          | West   | 0.015                 | 52             | 8              | 8.30          | I    | 11.94            |
| 92  | Slender-billed Scimitar Babbler | <i>Pomatorhinus superciliaris</i> | East   | 0.385                 | 59             | 55             | 28.00         | I    | 13.01            |
| 93  | Speckled Wood Pigeon            | <i>Columba hodgsonii</i>          | West   | 0.000                 | 9              | 7              | 312.50        | F    | 14.92            |
| 94  | Spot-winged Grosbeak            | <i>Mycerobas melanozanthos</i>    | West   | 0.000                 | 10             | 5              | 62.00         | G    | 10.12            |
| 95  | Spotted Elachura                | <i>Elachura formosa</i>           | East   | 0.000                 | 5              | 5              | 12.70         | I    | 15.85            |
| 96  | Spotted Laughingthrush          | <i>Garrulax ocellatus</i>         | East   | 0.073                 | 12             | 13             | 114.00        | O    | 11.50            |
| 97  | Spotted Nutcracker              | <i>Nucifraga caryocatactes</i>    | West   | 0.220                 | 92             | 100            | 193.50        | G    | 13.47            |
| 98  | Streaked Laughingthrush         | <i>Trochalopteron lineatum</i>    | West   | 0.121                 | 81             | 99             | 40.70         | O    | 13.22            |
| 99  | Streaked Spiderhunter           | <i>Arachnothera magna</i>         | East   | 0.492                 | 34             | 52             | 30.70         | O    | 16.36            |
| 100 | Striated Bulbul                 | <i>Pycnonotus striatus</i>        | East   | 0.291                 | 73             | 74             | 52.50         | O    | 15.05            |
| 101 | Striated Laughingthrush         | <i>Garrulax striatus</i>          | East   | 0.335                 | 111            | 158            | 92.00         | O    | 15.02            |

**Table S1. continued**

| ID  | Common Name                  | Scientific Name                  | Region | Thermal Niche Overlap | N <sub>S</sub> | N <sub>W</sub> | Body Mass (g) | Diet | Median Temp (°C) |
|-----|------------------------------|----------------------------------|--------|-----------------------|----------------|----------------|---------------|------|------------------|
| 102 | Striated Laughingthrush      | <i>Garrulax striatus</i>         | West   | 0.036                 | 19             | 14             | 92.00         | O    | 13.07            |
| 103 | Stripe-throated Yuhina       | <i>Yuhina gularis</i>            | East   | 0.150                 | 82             | 89             | 21.00         | O    | 13.04            |
| 104 | Sultan Tit                   | <i>Melanochlora sultanea</i>     | East   | 0.000                 | 13             | 17             | 37.60         | I    | 17.61            |
| 105 | Ultramarine Flycatcher       | <i>Ficedula superciliaris</i>    | West   | 0.003                 | 197            | 5              | 8.00          | I    | 13.52            |
| 106 | Variiegated Laughingthrush   | <i>Garrulax variegatus</i>       | West   | 0.154                 | 178            | 52             | 64.50         | O    | 11.81            |
| 107 | Wedge-tailed Green Pigeon    | <i>Treron sphenurus</i>          | East   | 0.167                 | 7              | 12             | 210.00        | F    | 11.92            |
| 108 | Western Crowned Warbler      | <i>Phylloscopus occipitalis</i>  | West   | 0.009                 | 100            | 23             | 9.00          | I    | 12.42            |
| 110 | Whiskered Yuhina             | <i>Yuhina flavicollis</i>        | East   | 0.880                 | 71             | 145            | 17.50         | O    | 14.80            |
| 109 | Whiskered Yuhina             | <i>Yuhina flavicollis</i>        | West   | 0.296                 | 30             | 18             | 17.50         | O    | 12.45            |
| 112 | Whistler's Warbler           | <i>Seicercus whistleri</i>       | East   | 1.063                 | 71             | 28             | 7.30          | I    | 11.87            |
| 111 | Whistler's Warbler           | <i>Seicercus whistleri</i>       | West   | 0.222                 | 137            | 14             | 7.30          | I    | 11.17            |
| 113 | White-browed Fulvetta        | <i>Fulvetta vinipectus</i>       | West   | 0.000                 | 5              | 7              | 12.00         | I    | 11.72            |
| 114 | White-browed Shortwing       | <i>Brachypteryx montana</i>      | East   | 0.051                 | 12             | 5              | 17.60         | I    | 12.04            |
| 115 | White-capped Redstart        | <i>Phoenicurus leucocephalus</i> | West   | 0.049                 | 8              | 20             | 30.50         | I    | 11.30            |
| 116 | White-cheeked Nuthatch       | <i>Sitta leucopsis</i>           | West   | 0.281                 | 81             | 88             | 14.70         | O    | 12.68            |
| 117 | White-collared Blackbird     | <i>Turdus albocinctus</i>        | West   | 0.000                 | 103            | 17             | 99.40         | O    | 11.86            |
| 118 | White-crested Laughingthrush | <i>Garrulax leucolophus</i>      | East   | 0.186                 | 48             | 39             | 124.00        | O    | 17.56            |
| 119 | White-spectacled Warbler     | <i>Seicercus affinis</i>         | East   | 0.609                 | 38             | 69             | 7.00          | I    | 14.75            |
| 120 | White-tailed Nuthatch        | <i>Sitta himalayensis</i>        | East   | 0.000                 | 9              | 11             | 14.50         | O    | 14.48            |
| 121 | White-tailed Nuthatch        | <i>Sitta himalayensis</i>        | West   | 0.020                 | 30             | 8              | 14.50         | O    | 13.18            |
| 122 | White-tailed Robin           | <i>Myiomela leucura</i>          | East   | 0.009                 | 80             | 5              | 27.00         | I    | 16.41            |
| 123 | White-throated Bushtit       | <i>Aegithalos niveogularis</i>   | West   | 0.000                 | 20             | 7              | 7.80          | I    | 11.88            |
| 124 | White-throated Fantail       | <i>Rhipidura albicollis</i>      | East   | 0.093                 | 28             | 12             | 12.90         | I    | 15.48            |
| 125 | Yellow-bellied Fantail       | <i>Chelidorhynch hypoxanthus</i> | East   | 1.163                 | 20             | 63             | 5.50          | I    | 12.42            |
| 126 | Yellow-bellied Fantail       | <i>Chelidorhynch hypoxanthus</i> | West   | 0.823                 | 26             | 31             | 5.50          | I    | 10.89            |
| 127 | Yellow-breasted Greenfinch   | <i>Chloris spinoides</i>         | West   | 0.000                 | 7              | 6              | 18.60         | G    | 13.64            |
| 128 | Yellow-browed Tit            | <i>Sylviparus modestus</i>       | East   | 0.203                 | 6              | 11             | 7.25          | I    | 14.60            |
| 129 | Yellow-throated Fulvetta     | <i>Alcippe cinerea</i>           | East   | 0.006                 | 20             | 19             | 10.00         | I    | 15.25            |

**Table S2. Season-specific thermal niche overlap between pairs of congeneric species as calculated according to Fig. 2b.  $N_{\text{Species 1}}$  and  $N_{\text{Species 2}}$  are the number of observations of Species 1 and Species 2. See Table S1 for scientific names for species.**

| Species 1 Common Name           | Species 2 Common Name       | Region | Season | Congeneric Overlap | $N_{\text{Species 1}}$ | $N_{\text{Species 2}}$ |
|---------------------------------|-----------------------------|--------|--------|--------------------|------------------------|------------------------|
| Ashy Drongo                     | Lesser Racket-tailed Drongo | East   | Winter | 0.701              | 35                     | 72                     |
| Ashy-throated Warbler           | Blyth's Leaf Warbler        | East   | Winter | 1.364              | 34                     | 62                     |
| Ashy-throated Warbler           | Greenish Warbler            | West   | Summer | 0.698              | 52                     | 49                     |
| Ashy-throated Warbler           | Grey-hooded Warbler         | West   | Summer | 0.540              | 52                     | 26                     |
| Ashy-throated Warbler           | Hume's Leaf Warbler         | West   | Summer | 0.662              | 52                     | 24                     |
| Ashy-throated Warbler           | Large-billed Leaf Warbler   | West   | Summer | 1.199              | 52                     | 25                     |
| Ashy-throated Warbler           | Western Crowned Warbler     | West   | Summer | 2.213              | 52                     | 100                    |
| Bar-tailed Treecreeper          | Hodgson's Treecreeper       | West   | Winter | 1.570              | 70                     | 45                     |
| Bar-throated Minla              | Blue-winged Minla           | East   | Winter | 0.076              | 14                     | 5                      |
| Bar-throated Minla              | Red-tailed Minla            | East   | Winter | 0.073              | 14                     | 11                     |
| Beautiful Nuthatch              | White-tailed Nuthatch       | East   | Summer | 0.000              | 6                      | 9                      |
| Beautiful Siberia               | Long-tailed Siberia         | East   | Winter | 0.151              | 214                    | 31                     |
| Beautiful Siberia               | Rufous-backed Siberia       | East   | Summer | 0.089              | 215                    | 9                      |
| Beautiful Siberia               | Rufous-backed Siberia       | East   | Winter | 0.075              | 214                    | 7                      |
| Bhutan Laughingthrush           | Black-faced Laughingthrush  | East   | Summer | 0.027              | 9                      | 12                     |
| Bhutan Laughingthrush           | Black-faced Laughingthrush  | East   | Winter | 0.045              | 8                      | 10                     |
| Black-and-yellow Grosbeak       | Collared Grosbeak           | West   | Summer | 1.241              | 84                     | 29                     |
| Black-and-yellow Grosbeak       | Collared Grosbeak           | West   | Winter | 1.680              | 75                     | 23                     |
| Black-and-yellow Grosbeak       | Spot-winged Grosbeak        | West   | Summer | 0.548              | 84                     | 10                     |
| Black-and-yellow Grosbeak       | White-winged Grosbeak       | West   | Winter | 0.004              | 75                     | 8                      |
| Black-chinned Yuhina            | Rufous-vented Yuhina        | East   | Summer | 0.007              | 8                      | 25                     |
| Black-eared Shrike-babbler      | Blyth's Shrike-babbler      | East   | Summer | 0.609              | 5                      | 17                     |
| Black-throated Bushtit          | White-throated Bushtit      | West   | Winter | 0.075              | 14                     | 7                      |
| Blue-fronted Redstart           | Blue-capped Redstart        | West   | Winter | 2.450              | 32                     | 36                     |
| Blue-fronted Redstart           | White-capped Redstart       | West   | Summer | 0.628              | 23                     | 8                      |
| Blue-winged Minla               | Bar-throated Minla          | East   | Summer | 0.515              | 19                     | 44                     |
| Blyth's Leaf Warbler            | Ashy-throated Warbler       | East   | Summer | 0.343              | 134                    | 9                      |
| Blyth's Leaf Warbler            | Ashy-throated Warbler       | West   | Summer | 1.634              | 123                    | 52                     |
| Blyth's Leaf Warbler            | Greenish Warbler            | West   | Summer | 1.185              | 123                    | 49                     |
| Blyth's Leaf Warbler            | Grey-hooded Warbler         | West   | Summer | 0.483              | 123                    | 26                     |
| Blyth's Leaf Warbler            | Hume's Leaf Warbler         | West   | Summer | 0.596              | 123                    | 24                     |
| Blyth's Leaf Warbler            | Large-billed Leaf Warbler   | West   | Summer | 0.610              | 123                    | 25                     |
| Blyth's Leaf Warbler            | Western Crowned Warbler     | West   | Summer | 2.537              | 123                    | 100                    |
| Brown Bullfinch                 | Grey-headed Bullfinch       | East   | Winter | 0.013              | 9                      | 6                      |
| Brown-flanked Bush Warbler      | Aberrant Bush Warbler       | West   | Summer | 0.252              | 54                     | 48                     |
| Brown-flanked Bush Warbler      | Yellow-bellied Bush Warbler | East   | Summer | 0.000              | 39                     | 16                     |
| Buff-barred Warbler             | Ashy-throated Warbler       | West   | Summer | 1.269              | 247                    | 52                     |
| Buff-barred Warbler             | Blyth's Leaf Warbler        | West   | Summer | 2.334              | 247                    | 123                    |
| Buff-barred Warbler             | Grey-hooded Warbler         | West   | Summer | 0.535              | 247                    | 26                     |
| Buff-barred Warbler             | Hume's Leaf Warbler         | West   | Summer | 0.537              | 247                    | 24                     |
| Buff-barred Warbler             | Large-billed Leaf Warbler   | West   | Summer | 0.523              | 247                    | 25                     |
| Buff-barred Warbler             | Western Crowned Warbler     | West   | Summer | 2.659              | 247                    | 100                    |
| Buff-barred Warbler             | Western Crowned Warbler     | West   | Winter | 2.355              | 30                     | 23                     |
| Chestnut-crowned Laughingthrush | Bhutan Laughingthrush       | East   | Summer | 0.106              | 107                    | 9                      |
| Chestnut-crowned Laughingthrush | Bhutan Laughingthrush       | East   | Winter | 0.039              | 105                    | 8                      |
| Chestnut-crowned Laughingthrush | Black-faced Laughingthrush  | East   | Summer | 0.077              | 107                    | 12                     |
| Chestnut-crowned Laughingthrush | Black-faced Laughingthrush  | East   | Winter | 0.004              | 105                    | 10                     |
| Chestnut-crowned Laughingthrush | Streaked Laughingthrush     | West   | Summer | 0.745              | 57                     | 81                     |
| Chestnut-crowned Laughingthrush | Streaked Laughingthrush     | West   | Winter | 0.272              | 11                     | 99                     |
| Chestnut-crowned Warbler        | Grey-cheeked Warbler        | East   | Winter | 0.298              | 9                      | 10                     |

**Table S2. continued**

| Species 1 Common Name            | Species 2 Common Name            | Region | Season | Congeneric Overlap | N <sub>Species 1</sub> | N <sub>Species 2</sub> |
|----------------------------------|----------------------------------|--------|--------|--------------------|------------------------|------------------------|
| Chestnut-crowned Warbler         | Whistler's Warbler               | East   | Summer | 0.303              | 8                      | 71                     |
| Chestnut-crowned Warbler         | White-spectacled Warbler         | East   | Winter | 0.220              | 9                      | 69                     |
| Chestnut-headed Tesia            | Grey-sided Bush Warbler          | West   | Summer | 0.662              | 75                     | 100                    |
| Chestnut-headed Tesia            | Grey-sided Bush Warbler          | West   | Winter | 0.350              | 29                     | 13                     |
| Coal Tit                         | Rufous-naped Tit                 | West   | Summer | 0.419              | 410                    | 22                     |
| Coal Tit                         | Rufous-naped Tit                 | West   | Winter | 0.774              | 217                    | 61                     |
| Coal Tit                         | Rufous-vented Tit                | West   | Summer | 1.048              | 410                    | 84                     |
| Coal Tit                         | Rufous-vented Tit                | West   | Winter | 0.554              | 217                    | 28                     |
| Collared Grosbeak                | White-winged Grosbeak            | West   | Winter | 0.001              | 23                     | 8                      |
| Golden Babbler                   | Rufous-capped Babbler            | East   | Summer | 0.822              | 41                     | 47                     |
| Golden Babbler                   | Rufous-capped Babbler            | East   | Winter | 0.803              | 29                     | 38                     |
| Great Barbet                     | Golden-throated Barbet           | East   | Summer | 1.052              | 135                    | 75                     |
| Great Barbet                     | Golden-throated Barbet           | East   | Winter | 0.170              | 115                    | 23                     |
| Greater Necklaced Laughingthrush | White-crested Laughingthrush     | East   | Winter | 0.314              | 11                     | 39                     |
| Green-tailed Sunbird             | Black-throated Sunbird           | East   | Summer | 0.136              | 184                    | 8                      |
| Greenish Warbler                 | Grey-hooded Warbler              | West   | Summer | 0.544              | 49                     | 26                     |
| Greenish Warbler                 | Hume's Leaf Warbler              | West   | Summer | 0.496              | 49                     | 24                     |
| Greenish Warbler                 | Large-billed Leaf Warbler        | West   | Summer | 0.441              | 49                     | 25                     |
| Greenish Warbler                 | Western Crowned Warbler          | West   | Summer | 1.351              | 49                     | 100                    |
| Grey-cheeked Warbler             | Chestnut-crowned Warbler         | East   | Summer | 0.197              | 44                     | 8                      |
| Grey-cheeked Warbler             | Whistler's Warbler               | East   | Summer | 0.337              | 44                     | 71                     |
| Grey-cheeked Warbler             | White-spectacled Warbler         | East   | Winter | 2.440              | 10                     | 69                     |
| Grey-hooded Warbler              | Buff-barred Warbler              | West   | Winter | 0.181              | 7                      | 30                     |
| Grey-hooded Warbler              | Hume's Leaf Warbler              | West   | Summer | 0.525              | 26                     | 24                     |
| Grey-hooded Warbler              | Large-billed Leaf Warbler        | West   | Summer | 0.626              | 26                     | 25                     |
| Grey-hooded Warbler              | Lemon-rumped Warbler             | West   | Winter | 1.478              | 7                      | 52                     |
| Grey-hooded Warbler              | Western Crowned Warbler          | West   | Winter | 0.198              | 7                      | 23                     |
| Grey-sided Laughingthrush        | Greater Necklaced Laughingthrush | East   | Winter | 0.185              | 17                     | 11                     |
| Grey-sided Laughingthrush        | Spotted Laughingthrush           | East   | Summer | 0.229              | 50                     | 12                     |
| Grey-sided Laughingthrush        | White-crested Laughingthrush     | East   | Winter | 0.097              | 17                     | 39                     |
| Hill Partridge                   | Chestnut-breasted Partridge      | East   | Summer | 0.010              | 125                    | 5                      |
| Himalayan Bluetail               | Golden Bush Robin                | West   | Summer | 1.052              | 175                    | 36                     |
| Himalayan Bluetail               | Golden Bush Robin                | West   | Winter | 0.199              | 44                     | 14                     |
| Hoary-throated Barwing           | Rusty-fronted Barwing            | East   | Winter | 0.400              | 26                     | 19                     |
| Hodgson's Treecreeper            | Bar-tailed Treecreeper           | West   | Summer | 0.526              | 84                     | 123                    |
| Hume's Leaf Warbler              | Large-billed Leaf Warbler        | West   | Summer | 0.778              | 24                     | 25                     |
| Indian Cuckoo                    | Himalayan Cuckoo                 | East   | Summer | 0.192              | 67                     | 26                     |
| Indian Cuckoo                    | Lesser Cuckoo                    | East   | Summer | 1.038              | 67                     | 62                     |
| Large Hawk Cuckoo                | Hodgson's Hawk Cuckoo            | East   | Summer | 0.447              | 75                     | 7                      |
| Large Niltava                    | Rufous-bellied Niltava           | East   | Summer | 0.506              | 24                     | 57                     |
| Large Niltava                    | Small Niltava                    | East   | Summer | 1.329              | 24                     | 19                     |
| Lemon-rumped Warbler             | Ashy-throated Warbler            | West   | Summer | 1.761              | 431                    | 52                     |
| Lemon-rumped Warbler             | Blyth's Leaf Warbler             | West   | Summer | 2.655              | 431                    | 123                    |
| Lemon-rumped Warbler             | Buff-barred Warbler              | West   | Summer | 2.614              | 431                    | 247                    |
| Lemon-rumped Warbler             | Buff-barred Warbler              | West   | Winter | 0.193              | 52                     | 30                     |
| Lemon-rumped Warbler             | Greenish Warbler                 | West   | Summer | 1.336              | 431                    | 49                     |
| Lemon-rumped Warbler             | Grey-hooded Warbler              | West   | Summer | 0.590              | 431                    | 26                     |
| Lemon-rumped Warbler             | Hume's Leaf Warbler              | West   | Summer | 0.566              | 431                    | 24                     |
| Lemon-rumped Warbler             | Large-billed Leaf Warbler        | West   | Summer | 0.549              | 431                    | 25                     |
| Lemon-rumped Warbler             | Western Crowned Warbler          | West   | Summer | 3.637              | 431                    | 100                    |
| Lemon-rumped Warbler             | Western Crowned Warbler          | West   | Winter | 0.185              | 52                     | 23                     |
| Lesser Cuckoo                    | Eurasian Cuckoo                  | West   | Summer | 0.459              | 40                     | 13                     |
| Lesser Cuckoo                    | Himalayan Cuckoo                 | East   | Summer | 0.775              | 62                     | 26                     |

**Table S2. continued**

| Species 1 Common Name           | Species 2 Common Name            | Region | Season | Congeneric Overlap | N <sub>Species 1</sub> | N <sub>Species 2</sub> |
|---------------------------------|----------------------------------|--------|--------|--------------------|------------------------|------------------------|
| Lesser Racket-tailed Drongo     | Ashy Drongo                      | East   | Summer | 0.833              | 51                     | 61                     |
| Long-tailed Sibia               | Beautiful Sibia                  | East   | Summer | 0.424              | 30                     | 215                    |
| Long-tailed Sibia               | Rufous-backed Sibia              | East   | Summer | 0.148              | 30                     | 9                      |
| Long-tailed Sibia               | Rufous-backed Sibia              | East   | Winter | 0.480              | 31                     | 7                      |
| Long-tailed Thrush              | Plain-backed Thrush              | West   | Winter | 0.000              | 5                      | 5                      |
| Long-tailed Thrush              | Scaly Thrush                     | West   | Summer | 0.177              | 23                     | 17                     |
| Mistle Thrush                   | Black-throated Thrush            | West   | Winter | 0.063              | 11                     | 12                     |
| Mistle Thrush                   | White-collared Blackbird         | West   | Winter | 0.050              | 11                     | 17                     |
| Pink-browed Rosefinch           | Common Rosefinch                 | West   | Summer | 0.138              | 95                     | 7                      |
| Pink-browed Rosefinch           | Common Rosefinch                 | West   | Winter | 3.049              | 25                     | 11                     |
| Plumbeous Water Redstart        | Blue-capped Redstart             | West   | Winter | 0.327              | 26                     | 36                     |
| Plumbeous Water Redstart        | Blue-fronted Redstart            | West   | Summer | 0.369              | 91                     | 23                     |
| Plumbeous Water Redstart        | Blue-fronted Redstart            | West   | Winter | 0.229              | 26                     | 32                     |
| Plumbeous Water Redstart        | White-capped Redstart            | West   | Summer | 0.692              | 91                     | 8                      |
| Plumbeous Water Redstart        | White-capped Redstart            | West   | Winter | 1.457              | 26                     | 20                     |
| Red-headed Bullfinch            | Brown Bullfinch                  | West   | Summer | 0.196              | 27                     | 19                     |
| Red-headed Trogon               | Ward's Trogon                    | East   | Summer | 0.000              | 15                     | 5                      |
| Red-tailed Minla                | Bar-throated Minla               | East   | Summer | 0.815              | 29                     | 44                     |
| Red-tailed Minla                | Blue-winged Minla                | East   | Summer | 0.530              | 29                     | 19                     |
| Red-tailed Minla                | Blue-winged Minla                | East   | Winter | 0.000              | 11                     | 5                      |
| Rosy Pipit                      | Olive-backed Pipit               | West   | Summer | 3.573              | 103                    | 56                     |
| Rufous-breasted Accentor        | Altai Accentor                   | West   | Winter | 0.179              | 5                      | 15                     |
| Rufous-gorgeted Flycatcher      | Slaty-blue Flycatcher            | West   | Summer | 2.515              | 186                    | 52                     |
| Rufous-gorgeted Flycatcher      | Slaty-blue Flycatcher            | West   | Winter | 0.228              | 29                     | 8                      |
| Rufous-naped Tit                | Rufous-vented Tit                | West   | Summer | 0.744              | 22                     | 84                     |
| Rufous-naped Tit                | Rufous-vented Tit                | West   | Winter | 0.757              | 61                     | 28                     |
| Rufous-throated Partridge       | Chestnut-breasted Partridge      | East   | Summer | 0.011              | 21                     | 5                      |
| Rufous-throated Partridge       | Hill Partridge                   | East   | Summer | 0.590              | 21                     | 125                    |
| Rufous-vented Yuhina            | Black-chinned Yuhina             | East   | Winter | 0.930              | 76                     | 29                     |
| Rufous-winged Fulvetta          | Yellow-throated Fulvetta         | East   | Winter | 0.496              | 9                      | 19                     |
| Rusty-fronted Barwing           | Hoary-throated Barwing           | East   | Summer | 1.343              | 63                     | 20                     |
| Scaly-bellied Woodpecker        | Grey-headed Woodpecker           | West   | Summer | 0.246              | 16                     | 17                     |
| Scaly-breasted Wren Babbler     | Nepal Wren Babbler               | West   | Summer | 0.682              | 89                     | 44                     |
| Silver-eared Mesia              | Red-billed Leiothrix             | East   | Summer | 0.032              | 82                     | 61                     |
| Slaty-bellied Tesia             | Grey-bellied Tesia               | East   | Summer | 0.398              | 29                     | 127                    |
| Slaty-blue Flycatcher           | Rufous-gorgeted Flycatcher       | East   | Winter | 0.849              | 68                     | 73                     |
| Slender-billed Scimitar Babbler | Streak-breasted Scimitar Babbler | East   | Summer | 0.219              | 59                     | 8                      |
| Small Niltava                   | Rufous-bellied Niltava           | East   | Summer | 0.277              | 19                     | 57                     |
| Speckled Wood Pigeon            | Snow Pigeon                      | West   | Winter | 0.000              | 7                      | 9                      |
| Spot-winged Grosbeak            | Black-and-yellow Grosbeak        | West   | Winter | 0.005              | 5                      | 75                     |
| Spot-winged Grosbeak            | Collared Grosbeak                | West   | Summer | 0.650              | 10                     | 29                     |
| Spot-winged Grosbeak            | Collared Grosbeak                | West   | Winter | 0.001              | 5                      | 23                     |
| Spot-winged Grosbeak            | White-winged Grosbeak            | West   | Winter | 0.000              | 5                      | 8                      |
| Spotted Laughingthrush          | Greater Necklaced Laughingthrush | East   | Winter | 0.000              | 13                     | 11                     |
| Spotted Laughingthrush          | Grey-sided Laughingthrush        | East   | Winter | 0.059              | 13                     | 17                     |
| Spotted Laughingthrush          | White-crested Laughingthrush     | East   | Winter | 0.000              | 13                     | 39                     |
| Striated Laughingthrush         | Greater Necklaced Laughingthrush | East   | Winter | 0.093              | 158                    | 11                     |
| Striated Laughingthrush         | Grey-sided Laughingthrush        | East   | Summer | 2.985              | 111                    | 50                     |
| Striated Laughingthrush         | Grey-sided Laughingthrush        | East   | Winter | 1.043              | 158                    | 17                     |
| Striated Laughingthrush         | Spotted Laughingthrush           | East   | Summer | 0.167              | 111                    | 12                     |
| Striated Laughingthrush         | Spotted Laughingthrush           | East   | Winter | 0.102              | 158                    | 13                     |
| Striated Laughingthrush         | Variiegated Laughingthrush       | West   | Winter | 0.000              | 14                     | 52                     |
| Striated Laughingthrush         | White-crested Laughingthrush     | East   | Summer | 0.657              | 111                    | 48                     |



**Table S2. continued**

| Species 1 Common Name         | Species 2 Common Name            | Region | Season | Congeneric Overlap | N <sub>Species 1</sub> | N <sub>Species 2</sub> |
|-------------------------------|----------------------------------|--------|--------|--------------------|------------------------|------------------------|
| Striated Laughingthrush       | White-crested Laughingthrush     | East   | Winter | 0.136              | 158                    | 39                     |
| Striated Laughingthrush       | White-throated Laughingthrush    | East   | Winter | 0.192              | 158                    | 9                      |
| Stripe-throated Yuhina        | Black-chinned Yuhina             | East   | Summer | 0.112              | 82                     | 8                      |
| Stripe-throated Yuhina        | Black-chinned Yuhina             | East   | Winter | 0.734              | 89                     | 29                     |
| Stripe-throated Yuhina        | Rufous-vented Yuhina             | East   | Summer | 0.489              | 82                     | 25                     |
| Stripe-throated Yuhina        | Rufous-vented Yuhina             | East   | Winter | 1.404              | 89                     | 76                     |
| Stripe-throated Yuhina        | White-naped Yuhina               | East   | Summer | 0.011              | 82                     | 5                      |
| Ultramarine Flycatcher        | Rufous-gorgeted Flycatcher       | West   | Summer | 0.837              | 197                    | 186                    |
| Ultramarine Flycatcher        | Rufous-gorgeted Flycatcher       | West   | Winter | 0.009              | 5                      | 29                     |
| Ultramarine Flycatcher        | Slaty-blue Flycatcher            | West   | Summer | 1.394              | 197                    | 52                     |
| Ultramarine Flycatcher        | Slaty-blue Flycatcher            | West   | Winter | 0.034              | 5                      | 8                      |
| Variiegated Laughingthrush    | Striated Laughingthrush          | West   | Summer | 0.386              | 178                    | 19                     |
| Western Crowned Warbler       | Grey-hooded Warbler              | West   | Summer | 0.822              | 100                    | 26                     |
| Western Crowned Warbler       | Hume's Leaf Warbler              | West   | Summer | 0.789              | 100                    | 24                     |
| Western Crowned Warbler       | Large-billed Leaf Warbler        | West   | Summer | 0.772              | 100                    | 25                     |
| Whiskered Yuhina              | Black-chinned Yuhina             | East   | Summer | 0.376              | 71                     | 8                      |
| Whiskered Yuhina              | Black-chinned Yuhina             | East   | Winter | 0.536              | 145                    | 29                     |
| Whiskered Yuhina              | Rufous-vented Yuhina             | East   | Summer | 0.420              | 71                     | 25                     |
| Whiskered Yuhina              | Rufous-vented Yuhina             | East   | Winter | 1.662              | 145                    | 76                     |
| Whiskered Yuhina              | Stripe-throated Yuhina           | East   | Summer | 1.053              | 71                     | 82                     |
| Whiskered Yuhina              | Stripe-throated Yuhina           | East   | Winter | 0.633              | 145                    | 89                     |
| Whiskered Yuhina              | White-naped Yuhina               | East   | Summer | 0.118              | 71                     | 5                      |
| Whistler's Warbler            | Chestnut-crowned Warbler         | East   | Winter | 0.221              | 28                     | 9                      |
| Whistler's Warbler            | Grey-cheeked Warbler             | East   | Winter | 0.385              | 28                     | 10                     |
| Whistler's Warbler            | White-spectacled Warbler         | East   | Winter | 0.526              | 28                     | 69                     |
| White-capped Redstart         | Blue-capped Redstart             | West   | Winter | 0.511              | 20                     | 36                     |
| White-capped Redstart         | Blue-fronted Redstart            | West   | Winter | 0.335              | 20                     | 32                     |
| White-cheeked Nuthatch        | White-tailed Nuthatch            | West   | Summer | 0.921              | 81                     | 30                     |
| White-collared Blackbird      | Black-throated Thrush            | West   | Winter | 0.112              | 17                     | 12                     |
| White-collared Blackbird      | Grey-winged Blackbird            | West   | Summer | 0.436              | 103                    | 15                     |
| White-crested Laughingthrush  | Grey-sided Laughingthrush        | East   | Summer | 0.462              | 48                     | 50                     |
| White-crested Laughingthrush  | Spotted Laughingthrush           | East   | Summer | 0.000              | 48                     | 12                     |
| White-naped Yuhina            | Black-chinned Yuhina             | East   | Summer | 0.597              | 5                      | 8                      |
| White-naped Yuhina            | Rufous-vented Yuhina             | East   | Summer | 0.000              | 5                      | 25                     |
| White-spectacled Warbler      | Chestnut-crowned Warbler         | East   | Summer | 0.202              | 38                     | 8                      |
| White-spectacled Warbler      | Grey-cheeked Warbler             | East   | Summer | 3.297              | 38                     | 44                     |
| White-spectacled Warbler      | Whistler's Warbler               | East   | Summer | 0.470              | 38                     | 71                     |
| White-tailed Nuthatch         | White-cheeked Nuthatch           | West   | Winter | 0.078              | 8                      | 88                     |
| White-throated Bushtit        | Black-throated Bushtit           | West   | Summer | 0.162              | 20                     | 14                     |
| White-throated Laughingthrush | Greater Necklaced Laughingthrush | East   | Winter | 0.031              | 9                      | 11                     |
| White-throated Laughingthrush | Grey-sided Laughingthrush        | East   | Winter | 0.258              | 9                      | 17                     |
| White-throated Laughingthrush | Spotted Laughingthrush           | East   | Winter | 0.379              | 9                      | 13                     |
| White-throated Laughingthrush | White-crested Laughingthrush     | East   | Winter | 0.014              | 9                      | 39                     |
| Yellow-throated Fulvetta      | Rufous-winged Fulvetta           | East   | Summer | 0.120              | 20                     | 29                     |

**Table S3. Species excluded from analysis, sorted by region and exclusion reason.**

| Eastern Himalayas excluded species |                                    |                      |
|------------------------------------|------------------------------------|----------------------|
| Common Name                        | Scientific Name                    | Reason for exclusion |
| Bar-winged Wren-Babbler            | <i>Spelaeornis troglodytoides</i>  | Summer only          |
| Blyth's Tragopan                   | <i>Tragopan blythii</i>            | Summer only          |
| Buff-barred Warbler                | <i>Phylloscopus pulcher</i>        | Summer only          |
| Chestnut-breasted Partridge        | <i>Arborophila mandellii</i>       | Summer only          |
| Collared Owlet                     | <i>Glaucidium brodiei</i>          | Summer only          |
| Common Green Magpie                | <i>Cissa chinensis</i>             | Summer only          |
| Crested Serpent Eagle              | <i>Splironis cheela</i>            | Summer only          |
| Crimson-breasted Woodpecker        | <i>Dendrocopos cathpharius</i>     | Summer only          |
| Dark-sided Flycatcher              | <i>Muscicapa sibirica</i>          | Summer only          |
| Eurasian Cuckoo                    | <i>Cuculus canorus</i>             | Summer only          |
| Eyebrowed Wren-Babbler             | <i>Napothera epilepidota</i>       | Summer only          |
| Fulvous Parrotbill                 | <i>Suthora fulvifrons</i>          | Summer only          |
| Grey-hooded Warbler                | <i>Phylloscopus xanthoschistos</i> | Summer only          |
| Grey Bushchat                      | <i>Saxicola ferreus</i>            | Summer only          |
| Hair-crested Drongo                | <i>Dicrurus hottentottus</i>       | Summer only          |
| Himalayan Cuckoo                   | <i>Cuculus saturatus</i>           | Summer only          |
| Hodgson's Hawk Cuckoo              | <i>Hierococcyx nisicolor</i>       | Summer only          |
| Indian Blue Robin                  | <i>Larvivora brunnea</i>           | Summer only          |
| Indian Cuckoo                      | <i>Cuculus micropterus</i>         | Summer only          |
| Lesser Cuckoo                      | <i>Cuculus poliocephalus</i>       | Summer only          |
| Long-billed Wren-Babbler           | <i>Rimator malacoptilus</i>        | Summer only          |
| Mountain Imperial Pigeon           | <i>Ducula badia</i>                | Summer only          |
| Mrs Gould's Sunbird                | <i>Aethopyga gouldiae</i>          | Summer only          |
| Orange-headed Thrush               | <i>Geokichla citrina</i>           | Summer only          |
| Purple Cochoa                      | <i>Cochoa purpurea</i>             | Summer only          |
| Pygmy Flycatcher                   | <i>Muscicapella hodgsoni</i>       | Summer only          |
| Pygmy Wren Babbler                 | <i>Pnoepyga pusilla</i>            | Summer only          |
| Red-breasted Flycatcher            | <i>Ficedula parva</i>              | Summer only          |
| Rufous-bellied Woodpecker          | <i>Dendrocopos hyperythrus</i>     | Summer only          |
| Rufous-chinned Laughingthrush      | <i>Garrulax rufogularis</i>        | Summer only          |
| Sapphire Flycatcher                | <i>Ficedula sapphira</i>           | Summer only          |
| Scaly Thrush                       | <i>Zoothera dauma</i>              | Summer only          |
| Silver-eared Mesia                 | <i>Leiothrix argentauris</i>       | Summer only          |
| Slaty-bellied Tesia                | <i>Tesia olivea</i>                | Summer only          |
| Snowy-browed flycatcher            | <i>Ficedula hyperythra</i>         | Summer only          |
| Spot-bellied Eagle-Owl             | <i>Bubo nipalensis</i>             | Summer only          |
| Temminck's Tragopan                | <i>Tragopan temminckii</i>         | Summer only          |
| Verditer Flycatcher                | <i>Eumyias thalassinus</i>         | Summer only          |
| White-capped Redstart              | <i>Phoenicurus leucocephalus</i>   | Summer only          |
| Yellow-bellied Bush Warbler        | <i>Horornis acanthizoides</i>      | Summer only          |
| Besra                              | <i>Accipiter virgatus</i>          | Winter only          |
| Black-headed Shrike-babbler        | <i>Pteruthius rufiventer</i>       | Winter only          |
| Black Bulbul                       | <i>Hypsipetes leucocephalus</i>    | Winter only          |
| Blue Whistling Thrush              | <i>Myophonus caeruleus</i>         | Winter only          |
| Bronzed Drongo                     | <i>Dicrurus aeneus</i>             | Winter only          |
| Brown Bullfinch                    | <i>Pyrrhula nipalensis</i>         | Winter only          |
| Brown Parrotbill                   | <i>Chloronis unicolor</i>          | Winter only          |
| Bugun Liocichla                    | <i>Liocichla bugunorum</i>         | Winter only          |
| Coal Tit                           | <i>Periparus ater</i>              | Winter only          |
| Crested Kingfisher                 | <i>Megaceryle lugubris</i>         | Winter only          |
| Dark-breasted Rosefinch            | <i>Procarduelis nipalensis</i>     | Winter only          |
| Grey-headed Bullfinch              | <i>Pyrrhula erythaca</i>           | Winter only          |
| Himalayan Bluetail                 | <i>Tarsiger rufilatus</i>          | Winter only          |

**Table S3. continued**

| Eastern Himalayas excluded species |                                  |                                 |
|------------------------------------|----------------------------------|---------------------------------|
| Common Name                        | Scientific Name                  | Reason for exclusion            |
| House Swift                        | <i>Apus nipalensis</i>           | Winter only                     |
| Long-tailed Thrush                 | <i>Zoothera dixonii</i>          | Winter only                     |
| Mountain Hawk-Eagle                | <i>Nisaetus nipalensis</i>       | Winter only                     |
| Plain-backed Thrush                | <i>Zoothera mollissima</i>       | Winter only                     |
| Plumbeous Water Redstart           | <i>Phoenicurus fuliginosus</i>   | Winter only                     |
| Rufous-breasted Bush Robin         | <i>Tarsiger hyperythrus</i>      | Winter only                     |
| Rufous-fronted Bush-tit            | <i>Aegithalos iouschistos</i>    | Winter only                     |
| Rufous-gorgeted Flycatcher         | <i>Ficedula strophiiata</i>      | Winter only                     |
| Scarlet Minivet                    | <i>Pericrocotus speciosus</i>    | Winter only                     |
| Short-billed Minivet               | <i>Pericrocotus brevirostris</i> | Winter only                     |
| Slaty-blue Flycatcher              | <i>Ficedula tricolor</i>         | Winter only                     |
| Spotted Forktail                   | <i>Enicurus maculatus</i>        | Winter only                     |
| White-bellied Erpornis             | <i>Erpornis zantholeuca</i>      | Winter only                     |
| White-hooded Babbler               | <i>Gampsorhynchus rufulus</i>    | Winter only                     |
| White-throated Bulbul              | <i>Alophoixus flaveolus</i>      | Winter only                     |
| White-throated Laughingthrush      | <i>Garrulax albogularis</i>      | Winter only                     |
| Yellow-bellied Flowerpecker        | <i>Dicaeum melanoxanthum</i>     | Winter only                     |
| Yellow-breasted Greenfinch         | <i>Chloris spinoides</i>         | Winter only                     |
| Greater Necklaced Laughingthrush   | <i>Garrulax pectoralis</i>       | Low sample in summer            |
| Grey-chinned Minivat               | <i>Pericrocotus solaris</i>      | Low sample in summer            |
| Grey Treepie                       | <i>Dendrocitta formosae</i>      | Low sample in summer            |
| Lesser Shortwing                   | <i>Brachypteryx leucophris</i>   | Low sample in summer            |
| Long-tailed Broadbill              | <i>Psarisomus dalhousiae</i>     | Low sample in summer            |
| Olive-backed Pipit                 | <i>Anthus hodgsoni</i>           | Low sample in summer            |
| Red-faced Liocichla                | <i>Liocichla phoenicea</i>       | Low sample in summer            |
| Spotted Nutcracker                 | <i>Nucifraga caryocatactes</i>   | Low sample in summer            |
| Yellow-billed Blue Magpie          | <i>Urocissa flavirostris</i>     | Low sample in summer            |
| Barred Cuckoo-Dove                 | <i>Macropygia unchall</i>        | Low sample in winter            |
| Beautiful Nuthatch                 | <i>Sitta formosa</i>             | Low sample in winter            |
| Black-eared Shrike-babbler         | <i>Pteruthius melanotis</i>      | Low sample in winter            |
| Black-throated Sunbird             | <i>Aethopyga saturata</i>        | Low sample in winter            |
| Blue-fronted Robin                 | <i>Cinclidium frontale</i>       | Low sample in winter            |
| Blue-winged Laughingthrush         | <i>Trochalopteron squamatum</i>  | Low sample in winter            |
| Brown-flanked Bush Warbler         | <i>Horornis fortipes</i>         | Low sample in winter            |
| Grey-throated Babbler              | <i>Stachyris nigriceps</i>       | Low sample in winter            |
| Large Hawk Cuckoo                  | <i>Hierococcyx sparveroides</i>  | Low sample in winter            |
| Lesser Shortwing                   | <i>Brachypteryx leucophris</i>   | Low sample in winter            |
| Long-tailed Minivet                | <i>Pericrocotus ethologus</i>    | Low sample in winter            |
| Red-headed Trogon                  | <i>Harpactes erythrocephalus</i> | Low sample in winter            |
| Rufous-bellied Niltava             | <i>Niltava sundara</i>           | Low sample in winter            |
| Rufous-throated Partridge          | <i>Arborophila rufogularis</i>   | Low sample in winter            |
| Rufous-throated Wren-Babbler       | <i>Spelaornis caudatus</i>       | Low sample in winter            |
| Small Niltava                      | <i>Niltava macgrigoriae</i>      | Low sample in winter            |
| Streak-breasted Scimitar Babbler   | <i>Pomatorhinus ruficollis</i>   | Low sample in winter            |
| Ward's Trogon                      | <i>Harpactes wardi</i>           | Low sample in winter            |
| White-gorgeted Flycatcher          | <i>Anthipes monileger</i>        | Low sample in winter            |
| Black Eagle                        | <i>Ictinaetus malaiensis</i>     | Low sample in summer and winter |
| Blue-throated Barbet               | <i>Psilopogon asiaticus</i>      | Low sample in summer and winter |
| Ferruginous Flycatcher             | <i>Muscicapa ferruginea</i>      | Low sample in summer and winter |
| Lemon-rumped Warbler               | <i>Phylloscopus chloronotus</i>  | Low sample in summer and winter |
| Lesser Shortwing                   | <i>Brachypteryx leucophris</i>   | Low sample in summer and winter |
| Red Junglefowl                     | <i>Gallus gallus</i>             | Low sample in summer and winter |

**Table S3. continued**

| Western Himalayas excluded species |                                    |                      |
|------------------------------------|------------------------------------|----------------------|
| Common Name                        | Scientific Name                    | Reason for exclusion |
| Aberrant Bush Warbler              | <i>Horornis flavolivaceus</i>      | Summer only          |
| Ashy Drongo                        | <i>Dicrurus leucophaeus</i>        | Summer only          |
| Asian House Martin                 | <i>Delichon dasypus</i>            | Summer only          |
| Black Bulbul                       | <i>Hypsipetes leucocephalus</i>    | Summer only          |
| Brown-fronted Woodpecker           | <i>Dendrocopos auriceps</i>        | Summer only          |
| Cheer Pheasant                     | <i>Catreus wallichii</i>           | Summer only          |
| Chestnut-bellied Rock Thrush       | <i>Monticola rufiventris</i>       | Summer only          |
| Dark-sided Flycatcher              | <i>Muscicapa sibirica</i>          | Summer only          |
| Eurasian Cuckoo                    | <i>Cuculus canorus</i>             | Summer only          |
| Eurasian Jay                       | <i>Garrulus glandarius</i>         | Summer only          |
| Eurasian Woodcock                  | <i>Scolopax rusticola</i>          | Summer only          |
| Fire-breasted Flowerpecker         | <i>Dicaeum ignipectum</i>          | Summer only          |
| Green Shrike-babbler               | <i>Pteruthius xanthochlorus</i>    | Summer only          |
| Grey-bellied Cuckoo                | <i>Cacomantis passerinus</i>       | Summer only          |
| Grey-winged Blackbird              | <i>Turdus boulboul</i>             | Summer only          |
| Grey Bush Chat                     | <i>Saxicola ferreus</i>            | Summer only          |
| Himalayan Cuckoo                   | <i>Cuculus saturatus</i>           | Summer only          |
| Himalayan Snowcock                 | <i>Tetraogallus himalayensis</i>   | Summer only          |
| Himalayan Swiftlet                 | <i>Aerodramus brevirostris</i>     | Summer only          |
| Himalayan White-browed Rosefinch   | <i>Carpodacus thura</i>            | Summer only          |
| Indian Blue Robin                  | <i>Larvivora brunnea</i>           | Summer only          |
| Kalij Pheasant                     | <i>Lophura leucomelanos</i>        | Summer only          |
| Large Hawk Cuckoo                  | <i>Hierococcyx sparveroides</i>    | Summer only          |
| Lesser Cuckoo                      | <i>Cuculus poliocephalus</i>       | Summer only          |
| Long-billed Thrush                 | <i>Zoothera monticola</i>          | Summer only          |
| Mountain Scops Owl                 | <i>Otus spilocephalus</i>          | Summer only          |
| Mrs Gould's Sunbird                | <i>Aethopyga gouldiae</i>          | Summer only          |
| Nepal Wren Babbler                 | <i>Pnoepyga immaculata</i>         | Summer only          |
| Pacific Swift                      | <i>Apus pacificus</i>              | Summer only          |
| Red-fronted Rosefinch              | <i>Carpodacus puniceus</i>         | Summer only          |
| Rosy Pipit                         | <i>Anthus roseatus</i>             | Summer only          |
| Scaly Thrush                       | <i>Zoothera dauma</i>              | Summer only          |
| Slaty-headed Parakeet              | <i>Psittacula himalayana</i>       | Summer only          |
| Spectacled Finch                   | <i>Callacanthis burtoni</i>        | Summer only          |
| Tickell's Leaf Warbler             | <i>Phylloscopus affinis</i>        | Summer only          |
| Verditer Flycatcher                | <i>Eumyias thalassinus</i>         | Summer only          |
| Wedge-tailed Green Pigeon          | <i>Treron sphenurus</i>            | Summer only          |
| West Himalayan Bush Warbler        | <i>Locustella kashmirensis</i>     | Summer only          |
| Western Tragopan                   | <i>Tragopan melanocephalus</i>     | Summer only          |
| Alpine Accentor                    | <i>Prunella collaris</i>           | Winter only          |
| Alpine Swift                       | <i>Tachymarptis melba</i>          | Winter only          |
| Altai Accentor                     | <i>Prunella himalayana</i>         | Winter only          |
| Bearded Vulture                    | <i>Gypaetus barbatus</i>           | Winter only          |
| Black-lored Tit                    | <i>Maclolophus xanthogenys</i>     | Winter only          |
| Black-throated Accentor            | <i>Prunella atrogularis</i>        | Winter only          |
| Black-throated Thrush              | <i>Turdus atrogularis</i>          | Winter only          |
| Black Eagle                        | <i>Ictinaetus malaiensis</i>       | Winter only          |
| Blue-capped Redstart               | <i>Phoenicurus caeruleocephala</i> | Winter only          |
| Blyth's Shrike-babbler             | <i>Pteruthius aeralatus</i>        | Winter only          |
| Chestnut Thrush                    | <i>Turdus rubrocanus</i>           | Winter only          |
| Eurasian Eagle-Owl                 | <i>Bubo bubo</i>                   | Winter only          |
| Eurasian Sparrowhawk               | <i>Accipiter nisus</i>             | Winter only          |
| Eurasian Wren                      | <i>Troglodytes troglodytes</i>     | Winter only          |

**Table S3. continued**

| Western Himalayas excluded species |                                  |                                 |
|------------------------------------|----------------------------------|---------------------------------|
| Common Name                        | Scientific Name                  | Reason for exclusion            |
| Eurasian Wryneck                   | <i>Jynx torquilla</i>            | Winter only                     |
| European Goldfinch                 | <i>Carduelis carduelis</i>       | Winter only                     |
| Fire-capped Tit                    | <i>Cephalopyrus flammiceps</i>   | Winter only                     |
| Golden Eagle                       | <i>Aquila chrysaetos</i>         | Winter only                     |
| Hen Harrier                        | <i>Circus cyaneus</i>            | Winter only                     |
| Himalayan Vulture                  | <i>Gyps himalayensis</i>         | Winter only                     |
| Northern Goshawk                   | <i>Accipiter gentilis</i>        | Winter only                     |
| Rufous-breasted Accentor           | <i>Prunella strophciata</i>      | Winter only                     |
| Spotted Forktail                   | <i>Enicurus maculatus</i>        | Winter only                     |
| Tree Pipit                         | <i>Anthus trivialis</i>          | Winter only                     |
| Upland Pipit                       | <i>Anthus sylvanus</i>           | Winter only                     |
| Little Forktail                    | <i>Enicurus scouleri</i>         | Low sample in summer            |
| Mistle Thrush                      | <i>Turdus viscivorus</i>         | Low sample in summer            |
| Plain-backed Thrush                | <i>Zoothera mollissima</i>       | Low sample in summer            |
| Rock Bunting                       | <i>Emberiza cia</i>              | Low sample in summer            |
| White-winged Grosbeak              | <i>Mycerobas carnipes</i>        | Low sample in summer            |
| Ashy-throated Warbler              | <i>Phylloscopus maculipennis</i> | Low sample in winter            |
| Blyth's Leaf Warbler               | <i>Phylloscopus reguloides</i>   | Low sample in winter            |
| Brown-flanked Bush Warbler         | <i>Horornis fortipes</i>         | Low sample in winter            |
| Common Kestrel                     | <i>Falco tinnunculus</i>         | Low sample in winter            |
| Dark-breasted Rosefinch            | <i>Procarduelis nipalensis</i>   | Low sample in winter            |
| Grey-headed Canary-flycatcher      | <i>Culicicapa ceylonensis</i>    | Low sample in winter            |
| Grey-headed Woodpecker             | <i>Picus canus</i>               | Low sample in winter            |
| Hill Partridge                     | <i>Arborophila torqueola</i>     | Low sample in winter            |
| Hume's Leaf Warbler                | <i>Phylloscopus humei</i>        | Low sample in winter            |
| Olive-backed Pipit                 | <i>Anthus hodgsoni</i>           | Low sample in winter            |
| Red-headed Bullfinch               | <i>Pyrrhula erythrocephala</i>   | Low sample in winter            |
| Rufous Sibia                       | <i>Heterophasia capistrata</i>   | Low sample in winter            |
| Solitary Snipe                     | <i>Gallinago solitaria</i>       | Low sample in winter            |
| Yellow-billed Blue Magpie          | <i>Urocissa flavirostris</i>     | Low sample in winter            |
| Eurasian Hobby                     | <i>Falco subbuteo</i>            | Low sample in summer and winter |
| Himalayan Buzzard                  | <i>Buteo burmanicus</i>          | Low sample in summer and winter |
| Himalayan Owl                      | <i>Strix niviculum</i>           | Low sample in summer and winter |
| Yellow-browed Tit                  | <i>Sylviparus modestus</i>       | Low sample in summer and winter |

**Table S4. Season-specific thermal niche overlap between pairs of congeneric species using HBW taxonomy.**

| Species 1 Common Name           | Species 1 Scientific Name             | Species 2 Common Name            | Species 2 Scientific Name        | Region | Season | Congeneric Overlap | N <sub>Species 1</sub> | N <sub>Species 2</sub> |
|---------------------------------|---------------------------------------|----------------------------------|----------------------------------|--------|--------|--------------------|------------------------|------------------------|
| Green-tailed Sunbird            | <i>Aethopyga nipalensis</i>           | Black-throated Sunbird           | <i>Aethopyga saturata</i>        | East   | Summer | 0.136              | 184                    | 8                      |
| Golden Babbler                  | <i>Cyanoderma chrysaea</i>            | Rufous-capped Babbler            | <i>Cyanoderma ruficeps</i>       | East   | Summer | 0.822              | 41                     | 47                     |
| Lesser Racket-tailed Drongo     | <i>Dicrurus remifer</i>               | Ashy Drongo                      | <i>Dicrurus leucophaeus</i>      | East   | Summer | 0.833              | 51                     | 61                     |
| Red-headed Trogon               | <i>Harpactes erythrocephalus</i>      | Ward's Trogon                    | <i>Harpactes wardi</i>           | East   | Summer | 0.000              | 15                     | 5                      |
| Long-tailed Sibia               | <i>Heterophasia picaoides</i>         | Beautiful Sibia                  | <i>Heterophasia pulchella</i>    | East   | Summer | 0.424              | 30                     | 215                    |
| Large Hawk Cuckoo               | <i>Hierococcyx sparveroides</i>       | Hodgson's Hawk Cuckoo            | <i>Hierococcyx nicolor</i>       | East   | Summer | 0.447              | 75                     | 7                      |
| Brown-flanked Bush Warbler      | <i>Horornis fortipes</i>              | Yellow-bellied Bush Warbler      | <i>Horornis acanthizoides</i>    | East   | Summer | 0.000              | 39                     | 16                     |
| Silver-eared Mesia              | <i>Leiothrix argenteauris</i>         | Red-billed Leiothrix             | <i>Leiothrix lutea</i>           | East   | Summer | 0.032              | 82                     | 61                     |
| Slender-billed Scimitar Babbler | <i>Pomatorhinus superciliaris</i>     | Streak-breasted Scimitar Babbler | <i>Pomatorhinus ruficollis</i>   | East   | Summer | 0.219              | 59                     | 8                      |
| Great Barbet                    | <i>Psilopogon virens</i>              | Golden-throated Barbet           | <i>Psilopogon franklinii</i>     | East   | Summer | 1.052              | 135                    | 75                     |
| Black-eared Shrike-babbler      | <i>Pteruthius melanotis</i>           | Blyth's Shrike-babbler           | <i>Pteruthius aeralatus</i>      | East   | Summer | 0.609              | 5                      | 17                     |
| Yellow-throated Fulvetta        | <i>Schoeniparus cinerea</i>           | Rufous-winged Fulvetta           | <i>Schoeniparus castaneiceps</i> | East   | Summer | 0.120              | 20                     | 29                     |
| Beautiful Nuthatch              | <i>Sitta formosa</i>                  | White-tailed Nuthatch            | <i>Sitta himalayensis</i>        | East   | Summer | 0.000              | 6                      | 9                      |
| Slaty-bellied Tesia             | <i>Tesia olivea</i>                   | Grey-bellied Tesia               | <i>Tesia cyaniventer</i>         | East   | Summer | 0.398              | 29                     | 127                    |
| Rufous-throated Partridge       | <i>Arborophila rufogularis</i>        | Hill Partridge                   | <i>Arborophila torqueola</i>     | East   | Summer | 0.590              | 21                     | 125                    |
| Rufous-throated Partridge       | <i>Arborophila rufogularis</i>        | Chestnut-breasted Partridge      | <i>Arborophila mandellii</i>     | East   | Summer | 0.011              | 21                     | 5                      |
| Hill Partridge                  | <i>Arborophila torqueola</i>          | Chestnut-breasted Partridge      | <i>Arborophila mandellii</i>     | East   | Summer | 0.010              | 125                    | 5                      |
| Indian Cuckoo                   | <i>Cuculus micropterus</i>            | Lesser Cuckoo                    | <i>Cuculus poliocephalus</i>     | East   | Summer | 1.038              | 67                     | 62                     |
| Indian Cuckoo                   | <i>Cuculus micropterus</i>            | Himalayan Cuckoo                 | <i>Cuculus saturatus</i>         | East   | Summer | 0.192              | 67                     | 26                     |
| Lesser Cuckoo                   | <i>Cuculus poliocephalus</i>          | Himalayan Cuckoo                 | <i>Cuculus saturatus</i>         | East   | Summer | 0.775              | 62                     | 26                     |
| White-crested Laughingthrush    | <i>Garrulax leucolophus</i>           | Grey-sided Laughingthrush        | <i>Garrulax caerulatus</i>       | East   | Summer | 0.462              | 48                     | 50                     |
| White-crested Laughingthrush    | <i>Garrulax leucolophus</i>           | Spotted Laughingthrush           | <i>Garrulax ocellatus</i>        | East   | Summer | 0.000              | 48                     | 12                     |
| Grey-sided Laughingthrush       | <i>Garrulax caerulatus</i>            | Spotted Laughingthrush           | <i>Garrulax ocellatus</i>        | East   | Summer | 0.229              | 50                     | 12                     |
| Large Niltava                   | <i>Niltava grandis</i>                | Small Niltava                    | <i>Niltava macgrigoriae</i>      | East   | Summer | 1.329              | 24                     | 19                     |
| Large Niltava                   | <i>Niltava grandis</i>                | Rufous-bellied Niltava           | <i>Niltava sundara</i>           | East   | Summer | 0.506              | 24                     | 57                     |
| Small Niltava                   | <i>Niltava macgrigoriae</i>           | Rufous-bellied Niltava           | <i>Niltava sundara</i>           | East   | Summer | 0.277              | 19                     | 57                     |
| Chestnut-crowned Laughingthrush | <i>Trochalopteron erythrocephalum</i> | Bhutan Laughingthrush            | <i>Trochalopteron imbricatum</i> | East   | Summer | 0.106              | 107                    | 9                      |
| Chestnut-crowned Laughingthrush | <i>Trochalopteron erythrocephalum</i> | Black-faced Laughingthrush       | <i>Trochalopteron affine</i>     | East   | Summer | 0.077              | 107                    | 12                     |
| Bhutan Laughingthrush           | <i>Trochalopteron imbricatum</i>      | Black-faced Laughingthrush       | <i>Trochalopteron affine</i>     | East   | Summer | 0.027              | 9                      | 12                     |
| White-spectacled Warbler        | <i>Phylloscopus affinis</i>           | Grey-cheeked Warbler             | <i>Phylloscopus poliogenys</i>   | East   | Summer | 3.297              | 38                     | 44                     |
| White-spectacled Warbler        | <i>Phylloscopus affinis</i>           | Whistler's Warbler               | <i>Phylloscopus whistleri</i>    | East   | Summer | 0.470              | 38                     | 71                     |
| White-spectacled Warbler        | <i>Phylloscopus affinis</i>           | Ashy-throated Warbler            | <i>Phylloscopus maculipennis</i> | East   | Summer | 0.562              | 38                     | 9                      |
| Grey-cheeked Warbler            | <i>Phylloscopus poliogenys</i>        | Whistler's Warbler               | <i>Phylloscopus whistleri</i>    | East   | Summer | 0.337              | 44                     | 71                     |
| Grey-cheeked Warbler            | <i>Phylloscopus poliogenys</i>        | Ashy-throated Warbler            | <i>Phylloscopus maculipennis</i> | East   | Summer | 0.475              | 44                     | 9                      |
| Whistler's Warbler              | <i>Phylloscopus whistleri</i>         | Ashy-throated Warbler            | <i>Phylloscopus maculipennis</i> | East   | Summer | 0.708              | 71                     | 9                      |
| Whiskered Yuhina                | <i>Yuhina flavicollis</i>             | Stripe-throated Yuhina           | <i>Yuhina gularis</i>            | East   | Summer | 1.053              | 71                     | 82                     |
| Whiskered Yuhina                | <i>Yuhina flavicollis</i>             | White-naped Yuhina               | <i>Yuhina bakeri</i>             | East   | Summer | 0.118              | 71                     | 5                      |
| Whiskered Yuhina                | <i>Yuhina flavicollis</i>             | Black-chinned Yuhina             | <i>Yuhina nigrimenta</i>         | East   | Summer | 0.376              | 71                     | 8                      |

**Table S4. continued**

| Species 1 Common Name           | Species 1 Scientific Name             | Species 2 Common Name            | Species 2 Scientific Name        | Region | Season | Congeneric Overlap | N <sub>Species 1</sub> | N <sub>Species 2</sub> |
|---------------------------------|---------------------------------------|----------------------------------|----------------------------------|--------|--------|--------------------|------------------------|------------------------|
| Whiskered Yuhina                | <i>Yuhina flavicollis</i>             | Rufous-vented Yuhina             | <i>Yuhina occipitalis</i>        | East   | Summer | 0.420              | 71                     | 25                     |
| Stripe-throated Yuhina          | <i>Yuhina gularis</i>                 | White-naped Yuhina               | <i>Yuhina bakeri</i>             | East   | Summer | 0.011              | 82                     | 5                      |
| Stripe-throated Yuhina          | <i>Yuhina gularis</i>                 | Black-chinned Yuhina             | <i>Yuhina nigrimenta</i>         | East   | Summer | 0.112              | 82                     | 8                      |
| Stripe-throated Yuhina          | <i>Yuhina gularis</i>                 | Rufous-vented Yuhina             | <i>Yuhina occipitalis</i>        | East   | Summer | 0.489              | 82                     | 25                     |
| White-naped Yuhina              | <i>Yuhina bakeri</i>                  | Black-chinned Yuhina             | <i>Yuhina nigrimenta</i>         | East   | Summer | 0.597              | 5                      | 8                      |
| White-naped Yuhina              | <i>Yuhina bakeri</i>                  | Rufous-vented Yuhina             | <i>Yuhina occipitalis</i>        | East   | Summer | 0.000              | 5                      | 25                     |
| Black-chinned Yuhina            | <i>Yuhina nigrimenta</i>              | Rufous-vented Yuhina             | <i>Yuhina occipitalis</i>        | East   | Summer | 0.007              | 8                      | 25                     |
| Golden Babbler                  | <i>Cyanoderma chrysaea</i>            | Rufous-capped Babbler            | <i>Cyanoderma ruficeps</i>       | East   | Winter | 0.803              | 29                     | 38                     |
| Ashy Drongo                     | <i>Dicrurus leucophaeus</i>           | Lesser Racket-tailed Drongo      | <i>Dicrurus remifer</i>          | East   | Winter | 0.701              | 35                     | 72                     |
| Slaty-blue Flycatcher           | <i>Ficedula tricolor</i>              | Rufous-gorgeted Flycatcher       | <i>Ficedula strophciata</i>      | East   | Winter | 0.849              | 68                     | 73                     |
| Beautiful Sibia                 | <i>Heterophasia pulchella</i>         | Long-tailed Sibia                | <i>Heterophasia picaoides</i>    | East   | Winter | 0.151              | 214                    | 31                     |
| Great Barbet                    | <i>Psilopogon virens</i>              | Golden-throated Barbet           | <i>Psilopogon franklinii</i>     | East   | Winter | 0.170              | 115                    | 23                     |
| Brown Bullfinch                 | <i>Pyrrhula nipalensis</i>            | Grey-headed Bullfinch            | <i>Pyrrhula erythaca</i>         | East   | Winter | 0.013              | 9                      | 6                      |
| Rufous-winged Fulvetta          | <i>Schoeniparus castaneiceps</i>      | Yellow-throated Fulvetta         | <i>Schoeniparus cinerea</i>      | East   | Winter | 0.496              | 9                      | 19                     |
| Chestnut-crowned Laughingthrush | <i>Trochalopteron erythrocephalum</i> | Bhutan Laughingthrush            | <i>Trochalopteron imbricatum</i> | East   | Winter | 0.039              | 105                    | 8                      |
| Chestnut-crowned Laughingthrush | <i>Trochalopteron erythrocephalum</i> | Black-faced Laughingthrush       | <i>Trochalopteron affine</i>     | East   | Winter | 0.004              | 105                    | 10                     |
| Bhutan Laughingthrush           | <i>Trochalopteron imbricatum</i>      | Black-faced Laughingthrush       | <i>Trochalopteron affine</i>     | East   | Winter | 0.045              | 8                      | 10                     |
| Whistler's Warbler              | <i>Phylloscopus whistleri</i>         | Ashy-throated Warbler            | <i>Phylloscopus maculipennis</i> | East   | Winter | 0.511              | 28                     | 34                     |
| Whistler's Warbler              | <i>Phylloscopus whistleri</i>         | Grey-cheeked Warbler             | <i>Phylloscopus poliogenys</i>   | East   | Winter | 0.385              | 28                     | 10                     |
| Whistler's Warbler              | <i>Phylloscopus whistleri</i>         | White-spectacled Warbler         | <i>Phylloscopus affinis</i>      | East   | Winter | 0.526              | 28                     | 69                     |
| Ashy-throated Warbler           | <i>Phylloscopus maculipennis</i>      | Grey-cheeked Warbler             | <i>Phylloscopus poliogenys</i>   | East   | Winter | 1.169              | 34                     | 10                     |
| Ashy-throated Warbler           | <i>Phylloscopus maculipennis</i>      | White-spectacled Warbler         | <i>Phylloscopus affinis</i>      | East   | Winter | 1.417              | 34                     | 69                     |
| Grey-cheeked Warbler            | <i>Phylloscopus poliogenys</i>        | White-spectacled Warbler         | <i>Phylloscopus affinis</i>      | East   | Winter | 2.440              | 10                     | 69                     |
| Whiskered Yuhina                | <i>Yuhina flavicollis</i>             | Stripe-throated Yuhina           | <i>Yuhina gularis</i>            | East   | Winter | 0.633              | 145                    | 89                     |
| Whiskered Yuhina                | <i>Yuhina flavicollis</i>             | Rufous-vented Yuhina             | <i>Yuhina occipitalis</i>        | East   | Winter | 1.662              | 145                    | 76                     |
| Whiskered Yuhina                | <i>Yuhina flavicollis</i>             | Black-chinned Yuhina             | <i>Yuhina nigrimenta</i>         | East   | Winter | 0.536              | 145                    | 29                     |
| Stripe-throated Yuhina          | <i>Yuhina gularis</i>                 | Rufous-vented Yuhina             | <i>Yuhina occipitalis</i>        | East   | Winter | 1.404              | 89                     | 76                     |
| Stripe-throated Yuhina          | <i>Yuhina gularis</i>                 | Black-chinned Yuhina             | <i>Yuhina nigrimenta</i>         | East   | Winter | 0.734              | 89                     | 29                     |
| Rufous-vented Yuhina            | <i>Yuhina occipitalis</i>             | Black-chinned Yuhina             | <i>Yuhina nigrimenta</i>         | East   | Winter | 0.930              | 76                     | 29                     |
| White-throated Laughingthrush   | <i>Garrulax albogularis</i>           | Spotted Laughingthrush           | <i>Garrulax ocellatus</i>        | East   | Winter | 0.379              | 9                      | 13                     |
| White-throated Laughingthrush   | <i>Garrulax albogularis</i>           | Grey-sided Laughingthrush        | <i>Garrulax caerulatus</i>       | East   | Winter | 0.258              | 9                      | 17                     |
| White-throated Laughingthrush   | <i>Garrulax albogularis</i>           | Greater Necklaced Laughingthrush | <i>Garrulax pectoralis</i>       | East   | Winter | 0.031              | 9                      | 11                     |
| White-throated Laughingthrush   | <i>Garrulax albogularis</i>           | White-crested Laughingthrush     | <i>Garrulax leucolophus</i>      | East   | Winter | 0.014              | 9                      | 39                     |
| Spotted Laughingthrush          | <i>Garrulax ocellatus</i>             | Grey-sided Laughingthrush        | <i>Garrulax caerulatus</i>       | East   | Winter | 0.059              | 13                     | 17                     |
| Spotted Laughingthrush          | <i>Garrulax ocellatus</i>             | Greater Necklaced Laughingthrush | <i>Garrulax pectoralis</i>       | East   | Winter | 0.000              | 13                     | 11                     |
| Spotted Laughingthrush          | <i>Garrulax ocellatus</i>             | White-crested Laughingthrush     | <i>Garrulax leucolophus</i>      | East   | Winter | 0.000              | 13                     | 39                     |
| Grey-sided Laughingthrush       | <i>Garrulax caerulatus</i>            | Greater Necklaced Laughingthrush | <i>Garrulax pectoralis</i>       | East   | Winter | 0.185              | 17                     | 11                     |
| Grey-sided Laughingthrush       | <i>Garrulax caerulatus</i>            | White-crested Laughingthrush     | <i>Garrulax leucolophus</i>      | East   | Winter | 0.097              | 17                     | 39                     |

**Table S4. continued**

| Species 1 Common Name            | Species 1 Scientific Name             | Species 2 Common Name        | Species 2 Scientific Name          | Region | Season | Congeneric Overlap | N <sub>Species 1</sub> | N <sub>Species 2</sub> |
|----------------------------------|---------------------------------------|------------------------------|------------------------------------|--------|--------|--------------------|------------------------|------------------------|
| Greater Necklaced Laughingthrush | <i>Garrulax pectoralis</i>            | White-crested Laughingthrush | <i>Garrulax leucolophus</i>        | East   | Winter | 0.314              | 11                     | 39                     |
| White-throated Bushtit           | <i>Aegithalos niveogularis</i>        | Black-throated Bushtit       | <i>Aegithalos concinnus</i>        | West   | Summer | 0.162              | 20                     | 14                     |
| Rosy Pipit                       | <i>Anthus roseatus</i>                | Olive-backed Pipit           | <i>Anthus hodgsoni</i>             | West   | Summer | 3.573              | 103                    | 56                     |
| Pink-browed Rosefinch            | <i>Carpodacus rodochroa</i>           | Common Rosefinch             | <i>Carpodacus erythrinus</i>       | West   | Summer | 0.138              | 95                     | 7                      |
| Hodgson's Treecreeper            | <i>Certhia hodgsoni</i>               | Bar-tailed Treecreeper       | <i>Certhia himalayana</i>          | West   | Summer | 0.526              | 84                     | 123                    |
| Chestnut-headed Tesia            | <i>Cettia castaneocoronata</i>        | Grey-sided Bush Warbler      | <i>Cettia brunnifrons</i>          | West   | Summer | 0.662              | 75                     | 100                    |
| Lesser Cuckoo                    | <i>Cuculus poliocephalus</i>          | Eurasian Cuckoo              | <i>Cuculus canorus</i>             | West   | Summer | 0.459              | 40                     | 13                     |
| Brown-flanked Bush Warbler       | <i>Horornis fortipes</i>              | Aberrant Bush Warbler        | <i>Horornis flavolivaceus</i>      | West   | Summer | 0.252              | 54                     | 48                     |
| Scaly-bellied Woodpecker         | <i>Picus squamatus</i>                | Grey-headed Woodpecker       | <i>Picus canus</i>                 | West   | Summer | 0.246              | 16                     | 17                     |
| Scaly-breasted Wren Babbler      | <i>Pnoepyga albiventer</i>            | Nepal Wren Babbler           | <i>Pnoepyga immaculata</i>         | West   | Summer | 0.682              | 89                     | 44                     |
| Red-headed Bullfinch             | <i>Pyrrhula erythrocephala</i>        | Brown Bullfinch              | <i>Pyrrhula nipalensis</i>         | West   | Summer | 0.196              | 27                     | 19                     |
| White-cheeked Nuthatch           | <i>Sitta leucopsis</i>                | White-tailed Nuthatch        | <i>Sitta himalayensis</i>          | West   | Summer | 0.921              | 81                     | 30                     |
| Himalayan Bluetail               | <i>Tarsiger rufilatus</i>             | Golden Bush Robin            | <i>Tarsiger chrysaeus</i>          | West   | Summer | 1.052              | 175                    | 36                     |
| White-collared Blackbird         | <i>Turdus albocinctus</i>             | Grey-winged Blackbird        | <i>Turdus boulboul</i>             | West   | Summer | 0.436              | 103                    | 15                     |
| Long-tailed Thrush               | <i>Zoothera dixonii</i>               | Scaly Thrush                 | <i>Zoothera dauma</i>              | West   | Summer | 0.177              | 23                     | 17                     |
| Ultramarine Flycatcher           | <i>Ficedula superciliaris</i>         | Rufous-gorgeted Flycatcher   | <i>Ficedula strophiate</i>         | West   | Summer | 0.837              | 197                    | 186                    |
| Ultramarine Flycatcher           | <i>Ficedula superciliaris</i>         | Slaty-blue Flycatcher        | <i>Ficedula tricolor</i>           | West   | Summer | 1.394              | 197                    | 52                     |
| Rufous-gorgeted Flycatcher       | <i>Ficedula strophiate</i>            | Slaty-blue Flycatcher        | <i>Ficedula tricolor</i>           | West   | Summer | 2.515              | 186                    | 52                     |
| Black-and-yellow Grosbeak        | <i>Mycerobas icterioides</i>          | Spot-winged Grosbeak         | <i>Mycerobas melanozanthos</i>     | West   | Summer | 0.548              | 84                     | 10                     |
| Black-and-yellow Grosbeak        | <i>Mycerobas icterioides</i>          | Collared Grosbeak            | <i>Mycerobas affinis</i>           | West   | Summer | 1.241              | 84                     | 29                     |
| Spot-winged Grosbeak             | <i>Mycerobas melanozanthos</i>        | Collared Grosbeak            | <i>Mycerobas affinis</i>           | West   | Summer | 0.650              | 10                     | 29                     |
| Coal Tit                         | <i>Periparus ater</i>                 | Rufous-naped Tit             | <i>Periparus rufonuchalis</i>      | West   | Summer | 0.419              | 410                    | 22                     |
| Coal Tit                         | <i>Periparus ater</i>                 | Rufous-vented Tit            | <i>Periparus rubidiventris</i>     | West   | Summer | 1.048              | 410                    | 84                     |
| Rufous-naped Tit                 | <i>Periparus rufonuchalis</i>         | Rufous-vented Tit            | <i>Periparus rubidiventris</i>     | West   | Summer | 0.744              | 22                     | 84                     |
| Plumbeous Water Redstart         | <i>Phoenicurus fuliginosus</i>        | Blue-fronted Redstart        | <i>Phoenicurus frontalis</i>       | West   | Summer | 0.369              | 91                     | 23                     |
| Plumbeous Water Redstart         | <i>Phoenicurus fuliginosus</i>        | White-capped Redstart        | <i>Phoenicurus leucocephalus</i>   | West   | Summer | 0.692              | 91                     | 8                      |
| Blue-fronted Redstart            | <i>Phoenicurus frontalis</i>          | White-capped Redstart        | <i>Phoenicurus leucocephalus</i>   | West   | Summer | 0.628              | 23                     | 8                      |
| Chestnut-crowned Laughingthrush  | <i>Trochalopteron erythrocephalum</i> | Variiegated Laughingthrush   | <i>Trochalopteron variegatus</i>   | West   | Summer | 0.423              | 57                     | 178                    |
| Chestnut-crowned Laughingthrush  | <i>Trochalopteron erythrocephalum</i> | Streaked Laughingthrush      | <i>Trochalopteron lineatum</i>     | West   | Summer | 0.745              | 57                     | 81                     |
| Variiegated Laughingthrush       | <i>Trochalopteron variegatus</i>      | Streaked Laughingthrush      | <i>Trochalopteron lineatum</i>     | West   | Summer | 0.944              | 178                    | 81                     |
| Lemon-rumped Warbler             | <i>Phylloscopus chloronotus</i>       | Whistler's Warbler           | <i>Phylloscopus whistleri</i>      | West   | Summer | 1.843              | 431                    | 137                    |
| Lemon-rumped Warbler             | <i>Phylloscopus chloronotus</i>       | Buff-barred Warbler          | <i>Phylloscopus pulcher</i>        | West   | Summer | 2.614              | 431                    | 247                    |
| Lemon-rumped Warbler             | <i>Phylloscopus chloronotus</i>       | Ashy-throated Warbler        | <i>Phylloscopus maculipennis</i>   | West   | Summer | 1.761              | 431                    | 52                     |
| Lemon-rumped Warbler             | <i>Phylloscopus chloronotus</i>       | Western Crowned Warbler      | <i>Phylloscopus occipitalis</i>    | West   | Summer | 3.637              | 431                    | 100                    |
| Lemon-rumped Warbler             | <i>Phylloscopus chloronotus</i>       | Grey-hooded Warbler          | <i>Phylloscopus xanthoschistos</i> | West   | Summer | 0.590              | 431                    | 26                     |
| Lemon-rumped Warbler             | <i>Phylloscopus chloronotus</i>       | Hume's Leaf Warbler          | <i>Phylloscopus humei</i>          | West   | Summer | 0.566              | 431                    | 24                     |
| Lemon-rumped Warbler             | <i>Phylloscopus chloronotus</i>       | Large-billed Leaf Warbler    | <i>Phylloscopus magnirostris</i>   | West   | Summer | 0.549              | 431                    | 25                     |
| Whistler's Warbler               | <i>Phylloscopus whistleri</i>         | Buff-barred Warbler          | <i>Phylloscopus pulcher</i>        | West   | Summer | 1.866              | 137                    | 247                    |



**Table S4. continued**

| Species 1 Common Name           | Species 1 Scientific Name             | Species 2 Common Name      | Species 2 Scientific Name          | Region | Season | Congeneric Overlap | N <sub>Species 1</sub> | N <sub>Species 2</sub> |
|---------------------------------|---------------------------------------|----------------------------|------------------------------------|--------|--------|--------------------|------------------------|------------------------|
| Whistler's Warbler              | <i>Phylloscopus whistleri</i>         | Ashy-throated Warbler      | <i>Phylloscopus maculipennis</i>   | West   | Summer | 1.124              | 137                    | 52                     |
| Whistler's Warbler              | <i>Phylloscopus whistleri</i>         | Western Crowned Warbler    | <i>Phylloscopus occipitalis</i>    | West   | Summer | 2.114              | 137                    | 100                    |
| Whistler's Warbler              | <i>Phylloscopus whistleri</i>         | Grey-hooded Warbler        | <i>Phylloscopus xanthoschistos</i> | West   | Summer | 0.538              | 137                    | 26                     |
| Whistler's Warbler              | <i>Phylloscopus whistleri</i>         | Hume's Leaf Warbler        | <i>Phylloscopus humei</i>          | West   | Summer | 1.051              | 137                    | 24                     |
| Whistler's Warbler              | <i>Phylloscopus whistleri</i>         | Large-billed Leaf Warbler  | <i>Phylloscopus magnirostris</i>   | West   | Summer | 0.736              | 137                    | 25                     |
| Buff-barred Warbler             | <i>Phylloscopus pulcher</i>           | Ashy-throated Warbler      | <i>Phylloscopus maculipennis</i>   | West   | Summer | 1.269              | 247                    | 52                     |
| Buff-barred Warbler             | <i>Phylloscopus pulcher</i>           | Western Crowned Warbler    | <i>Phylloscopus occipitalis</i>    | West   | Summer | 2.659              | 247                    | 100                    |
| Buff-barred Warbler             | <i>Phylloscopus pulcher</i>           | Grey-hooded Warbler        | <i>Phylloscopus xanthoschistos</i> | West   | Summer | 0.535              | 247                    | 26                     |
| Buff-barred Warbler             | <i>Phylloscopus pulcher</i>           | Hume's Leaf Warbler        | <i>Phylloscopus humei</i>          | West   | Summer | 0.537              | 247                    | 24                     |
| Buff-barred Warbler             | <i>Phylloscopus pulcher</i>           | Large-billed Leaf Warbler  | <i>Phylloscopus magnirostris</i>   | West   | Summer | 0.523              | 247                    | 25                     |
| Ashy-throated Warbler           | <i>Phylloscopus maculipennis</i>      | Western Crowned Warbler    | <i>Phylloscopus occipitalis</i>    | West   | Summer | 2.213              | 52                     | 100                    |
| Ashy-throated Warbler           | <i>Phylloscopus maculipennis</i>      | Grey-hooded Warbler        | <i>Phylloscopus xanthoschistos</i> | West   | Summer | 0.540              | 52                     | 26                     |
| Ashy-throated Warbler           | <i>Phylloscopus maculipennis</i>      | Hume's Leaf Warbler        | <i>Phylloscopus humei</i>          | West   | Summer | 0.662              | 52                     | 24                     |
| Ashy-throated Warbler           | <i>Phylloscopus maculipennis</i>      | Large-billed Leaf Warbler  | <i>Phylloscopus magnirostris</i>   | West   | Summer | 1.199              | 52                     | 25                     |
| Western Crowned Warbler         | <i>Phylloscopus occipitalis</i>       | Grey-hooded Warbler        | <i>Phylloscopus xanthoschistos</i> | West   | Summer | 0.822              | 100                    | 26                     |
| Western Crowned Warbler         | <i>Phylloscopus occipitalis</i>       | Hume's Leaf Warbler        | <i>Phylloscopus humei</i>          | West   | Summer | 0.789              | 100                    | 24                     |
| Western Crowned Warbler         | <i>Phylloscopus occipitalis</i>       | Large-billed Leaf Warbler  | <i>Phylloscopus magnirostris</i>   | West   | Summer | 0.772              | 100                    | 25                     |
| Grey-hooded Warbler             | <i>Phylloscopus xanthoschistos</i>    | Hume's Leaf Warbler        | <i>Phylloscopus humei</i>          | West   | Summer | 0.525              | 26                     | 24                     |
| Grey-hooded Warbler             | <i>Phylloscopus xanthoschistos</i>    | Large-billed Leaf Warbler  | <i>Phylloscopus magnirostris</i>   | West   | Summer | 0.626              | 26                     | 25                     |
| Hume's Leaf Warbler             | <i>Phylloscopus humei</i>             | Large-billed Leaf Warbler  | <i>Phylloscopus magnirostris</i>   | West   | Summer | 0.778              | 24                     | 25                     |
| Black-throated Bushtit          | <i>Aegithalos concinnus</i>           | White-throated Bushtit     | <i>Aegithalos niveogularis</i>     | West   | Winter | 0.075              | 14                     | 7                      |
| Pink-browed Rosefinch           | <i>Carpodacus rodochroa</i>           | Common Rosefinch           | <i>Carpodacus erythrinus</i>       | West   | Winter | 3.049              | 25                     | 11                     |
| Bar-tailed Treecreeper          | <i>Certhia himalayana</i>             | Hodgson's Treecreeper      | <i>Certhia hodgsoni</i>            | West   | Winter | 1.570              | 70                     | 45                     |
| Chestnut-headed Tesia           | <i>Cettia castaneocoronata</i>        | Grey-sided Bush Warbler    | <i>Cettia brunnifrons</i>          | West   | Winter | 0.350              | 29                     | 13                     |
| Speckled Wood Pigeon            | <i>Columba hodgsonii</i>              | Snow Pigeon                | <i>Columba leuconota</i>           | West   | Winter | 0.000              | 7                      | 9                      |
| Rufous-breasted Accentor        | <i>Prunella strophciata</i>           | Altai Accentor             | <i>Prunella himalayana</i>         | West   | Winter | 0.179              | 5                      | 15                     |
| White-tailed Nuthatch           | <i>Sitta himalayensis</i>             | White-cheeked Nuthatch     | <i>Sitta leucopsis</i>             | West   | Winter | 0.078              | 8                      | 88                     |
| Himalayan Bluetail              | <i>Tarsiger rufilatus</i>             | Golden Bush Robin          | <i>Tarsiger chrysaesus</i>         | West   | Winter | 0.199              | 44                     | 14                     |
| Long-tailed Thrush              | <i>Zoothera dixonii</i>               | Plain-backed Thrush        | <i>Zoothera mollissima</i>         | West   | Winter | 0.000              | 5                      | 5                      |
| Ultramarine Flycatcher          | <i>Ficedula superciliaris</i>         | Rufous-gorgeted Flycatcher | <i>Ficedula strophciata</i>        | West   | Winter | 0.009              | 5                      | 29                     |
| Ultramarine Flycatcher          | <i>Ficedula superciliaris</i>         | Slaty-blue Flycatcher      | <i>Ficedula tricolor</i>           | West   | Winter | 0.034              | 5                      | 8                      |
| Rufous-gorgeted Flycatcher      | <i>Ficedula strophciata</i>           | Slaty-blue Flycatcher      | <i>Ficedula tricolor</i>           | West   | Winter | 0.228              | 29                     | 8                      |
| Coal Tit                        | <i>Periparus ater</i>                 | Rufous-naped Tit           | <i>Periparus rufonuchalis</i>      | West   | Winter | 0.774              | 217                    | 61                     |
| Coal Tit                        | <i>Periparus ater</i>                 | Rufous-vented Tit          | <i>Periparus rubidiventris</i>     | West   | Winter | 0.554              | 217                    | 28                     |
| Rufous-naped Tit                | <i>Periparus rufonuchalis</i>         | Rufous-vented Tit          | <i>Periparus rubidiventris</i>     | West   | Winter | 0.757              | 61                     | 28                     |
| Chestnut-crowned Laughingthrush | <i>Trochalopteron erythrocephalum</i> | Variiegated Laughingthrush | <i>Trochalopteron variegatus</i>   | West   | Winter | 0.099              | 11                     | 52                     |
| Chestnut-crowned Laughingthrush | <i>Trochalopteron erythrocephalum</i> | Streaked Laughingthrush    | <i>Trochalopteron lineatum</i>     | West   | Winter | 0.272              | 11                     | 99                     |
| Variiegated Laughingthrush      | <i>Trochalopteron variegatus</i>      | Streaked Laughingthrush    | <i>Trochalopteron lineatum</i>     | West   | Winter | 0.347              | 52                     | 99                     |

**Table S4. continued**

| Species 1 Common Name     | Species 1 Scientific Name          | Species 2 Common Name     | Species 2 Scientific Name          | Region | Season | Congeneric Overlap | N <sub>Species 1</sub> | N <sub>Species 2</sub> |
|---------------------------|------------------------------------|---------------------------|------------------------------------|--------|--------|--------------------|------------------------|------------------------|
| Mistle Thrush             | <i>Turdus viscivorus</i>           | White-collared Blackbird  | <i>Turdus albocinctus</i>          | West   | Winter | 0.050              | 11                     | 17                     |
| Mistle Thrush             | <i>Turdus viscivorus</i>           | Black-throated Thrush     | <i>Turdus atrogularis</i>          | West   | Winter | 0.063              | 11                     | 12                     |
| White-collared Blackbird  | <i>Turdus albocinctus</i>          | Black-throated Thrush     | <i>Turdus atrogularis</i>          | West   | Winter | 0.112              | 17                     | 12                     |
| Spot-winged Grosbeak      | <i>Mycerobas melanozanthos</i>     | Black-and-yellow Grosbeak | <i>Mycerobas icteriodes</i>        | West   | Winter | 0.005              | 5                      | 75                     |
| Spot-winged Grosbeak      | <i>Mycerobas melanozanthos</i>     | Collared Grosbeak         | <i>Mycerobas affinis</i>           | West   | Winter | 0.001              | 5                      | 23                     |
| Spot-winged Grosbeak      | <i>Mycerobas melanozanthos</i>     | White-winged Grosbeak     | <i>Mycerobas carnipes</i>          | West   | Winter | 0.000              | 5                      | 8                      |
| Black-and-yellow Grosbeak | <i>Mycerobas icteriodes</i>        | Collared Grosbeak         | <i>Mycerobas affinis</i>           | West   | Winter | 1.680              | 75                     | 23                     |
| Black-and-yellow Grosbeak | <i>Mycerobas icteriodes</i>        | White-winged Grosbeak     | <i>Mycerobas carnipes</i>          | West   | Winter | 0.004              | 75                     | 8                      |
| Collared Grosbeak         | <i>Mycerobas affinis</i>           | White-winged Grosbeak     | <i>Mycerobas carnipes</i>          | West   | Winter | 0.001              | 23                     | 8                      |
| Plumbeous Water Redstart  | <i>Phoenicurus fuliginosus</i>     | White-capped Redstart     | <i>Phoenicurus leucocephalus</i>   | West   | Winter | 1.457              | 26                     | 20                     |
| Plumbeous Water Redstart  | <i>Phoenicurus fuliginosus</i>     | Blue-fronted Redstart     | <i>Phoenicurus frontalis</i>       | West   | Winter | 0.229              | 26                     | 32                     |
| Plumbeous Water Redstart  | <i>Phoenicurus fuliginosus</i>     | Blue-capped Redstart      | <i>Phoenicurus caeruleocephala</i> | West   | Winter | 0.327              | 26                     | 36                     |
| White-capped Redstart     | <i>Phoenicurus leucocephalus</i>   | Blue-fronted Redstart     | <i>Phoenicurus frontalis</i>       | West   | Winter | 0.335              | 20                     | 32                     |
| White-capped Redstart     | <i>Phoenicurus leucocephalus</i>   | Blue-capped Redstart      | <i>Phoenicurus caeruleocephala</i> | West   | Winter | 0.511              | 20                     | 36                     |
| Blue-fronted Redstart     | <i>Phoenicurus frontalis</i>       | Blue-capped Redstart      | <i>Phoenicurus caeruleocephala</i> | West   | Winter | 2.450              | 32                     | 36                     |
| Grey-hooded Warbler       | <i>Phylloscopus xanthoschistos</i> | Lemon-rumped Warbler      | <i>Phylloscopus chloronotus</i>    | West   | Winter | 1.478              | 7                      | 52                     |
| Grey-hooded Warbler       | <i>Phylloscopus xanthoschistos</i> | Whistler's Warbler        | <i>Phylloscopus whistleri</i>      | West   | Winter | 0.351              | 7                      | 14                     |
| Grey-hooded Warbler       | <i>Phylloscopus xanthoschistos</i> | Buff-barred Warbler       | <i>Phylloscopus pulcher</i>        | West   | Winter | 0.181              | 7                      | 30                     |
| Grey-hooded Warbler       | <i>Phylloscopus xanthoschistos</i> | Western Crowned Warbler   | <i>Phylloscopus occipitalis</i>    | West   | Winter | 0.198              | 7                      | 23                     |
| Lemon-rumped Warbler      | <i>Phylloscopus chloronotus</i>    | Whistler's Warbler        | <i>Phylloscopus whistleri</i>      | West   | Winter | 0.193              | 52                     | 14                     |
| Lemon-rumped Warbler      | <i>Phylloscopus chloronotus</i>    | Buff-barred Warbler       | <i>Phylloscopus pulcher</i>        | West   | Winter | 0.193              | 52                     | 30                     |
| Lemon-rumped Warbler      | <i>Phylloscopus chloronotus</i>    | Western Crowned Warbler   | <i>Phylloscopus occipitalis</i>    | West   | Winter | 0.185              | 52                     | 23                     |
| Whistler's Warbler        | <i>Phylloscopus whistleri</i>      | Buff-barred Warbler       | <i>Phylloscopus pulcher</i>        | West   | Winter | 0.065              | 14                     | 30                     |
| Whistler's Warbler        | <i>Phylloscopus whistleri</i>      | Western Crowned Warbler   | <i>Phylloscopus occipitalis</i>    | West   | Winter | 0.074              | 14                     | 23                     |
| Buff-barred Warbler       | <i>Phylloscopus pulcher</i>        | Western Crowned Warbler   | <i>Phylloscopus occipitalis</i>    | West   | Winter | 2.355              | 30                     | 23                     |
